# Supplementary material for: Adhesion strength and contractility enable metastatic cells to become adurotactic
Source: PubMed Central journal article supplement — Cell Rep. Author manuscript; Available in PMC 2021 Mar 27. (PMC7997775; doi:10.1016/j.celrep.2021.108816), 2021-03-09
Supplement: NIHMS1683087-supplement-1.pdf [file NIHMS1683087-supplement-1.pdf]

**Cell Reports, Volume 34**

**Supplemental information**

**Adhesion strength and contractility**

**enable metastatic cells to become adurotactic**

**Benjamin Yeoman, Gabriel Shatkin, Pranjali Beri, Afsheen Banisadr, Parag Katira, and Adam J. Engler**

1  
2  
3  
4  
5  
6  
7  
8  
9  
10  
11  
12  
13  
14  
15  
16  
17  
18  
19  
20  
21  
22  
23  
24  
25

## Supplementary Information

### Adhesion Strength and Contractility Enable Metastatic Cells to become Adurotactic

Benjamin Yeoman<sup>1,3</sup>, Gabriel Shatkin<sup>1</sup>, Pranjali Beri,<sup>1</sup> Afsheen Banisadr,<sup>2</sup> Parag Katira<sup>3,4†</sup>, and Adam J. Engler<sup>1,2,5‡</sup>

<sup>1</sup>Department of Bioengineering and <sup>2</sup>Biomedical Sciences Program, University of California, San Diego; La Jolla, CA 92093 USA

<sup>3</sup>Department of Mechanical Engineering and <sup>4</sup>Computational Sciences Research Center, San Diego State University; San Diego, CA 92182 USA

<sup>5</sup>Sanford Consortium for Regenerative Medicine; La Jolla, CA 92037 USA

†Corresponding Authors: [pkatira@sdsu.edu](mailto:pkatira@sdsu.edu)  
[aengler@ucsd.edu](mailto:aengler@ucsd.edu)

### MANUSCRIPT INFORMATION

*Abstract Word Count:* 147 words

*Manuscript Word Count:* 28,292 characters (including spaces and figure legends but excluding STAR Methods text, supplemental item legends, and References section)

*Figure Count:* 4

*Supplemental Figure Count:* 4

*Supplemental Video Count:* 7

*Supplemental Tables:* 1

### Running Title

Weakly Adherent Metastatic Cells are Adurotactic

Supplemental Figures

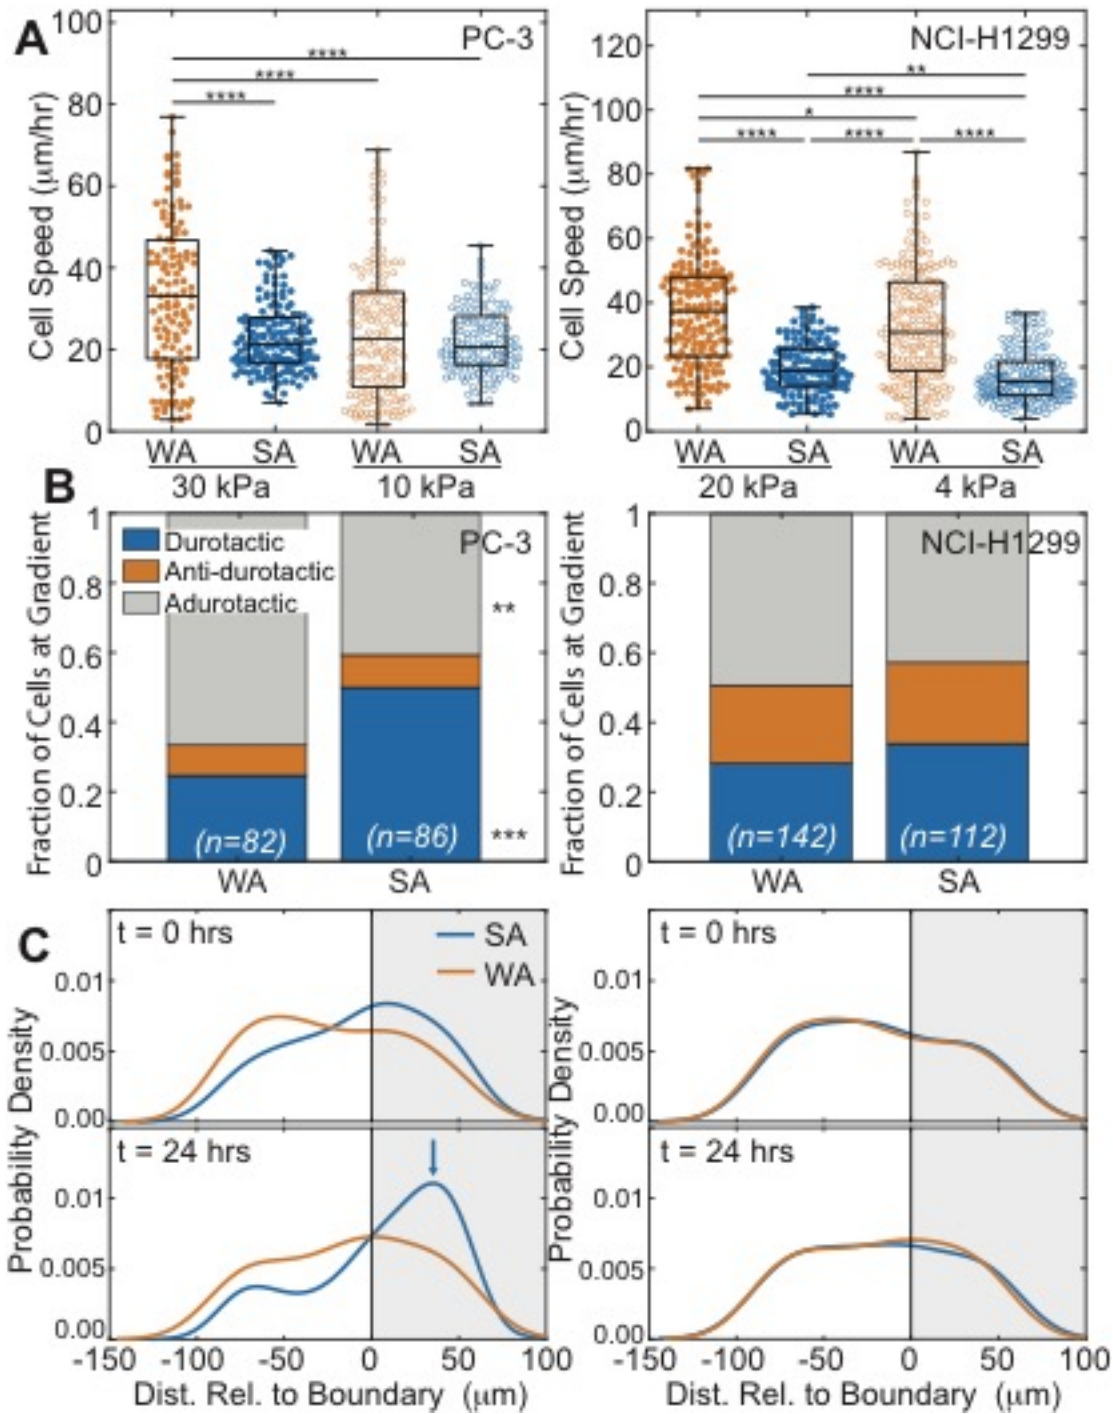

28

29 Supplemental Figure S1: Weakly adherent cells exhibit higher adurotactic behavior, Related to Figure

30 1. (A) PC-3 (left) and NCI-H1299 (right) cell speed on soft or stiff side of step-gradient hydrogels is

31 plotted. Data is shown for cells sorted by adhesion strength, i.e. weakly (orange) vs. strongly (blue), and  
32 cells on softer (open) vs. stiffer (closed) regions. ( $n > 200$  cells for each condition from triplicate  
33 experiments). **(B)** For adhesion sorted PC-3 and NCI-H1299 cells that encounter the step-gradient, the  
34 fraction of durotactic, anti-durotactic, and adurotactic behavior is plotted. Data represents  $n = 82$  of 210  
35 WA PC-3 cells and 86 of 246 SA PC-3 cells and  $n = 142$  of 231 WA NCI-H1299 cells and 112 of 247 SA NCI-  
36 H1299 cells over triplicate experiments; those not counted did not interact with the gradient. **(C)** At 0  
37 and 24 hours, PC-3 and NCI-H1299 cell probability density versus hydrogel position is shown for weakly  
38 (orange) vs. strongly (blue) adherent cells from triplicate experiments. The stiffer region is shaded in  
39 gray. Blue arrow indicates a peak in the strongly adherent cell distribution at 24 hours.  $*p < 0.05$ ,  $**p < 10^{-2}$ ,  
40  $***p < 10^{-4}$ ,  $****p < 10^{-5}$  determined by one-way ANOVA with Tukey test for multiple comparisons for  
41 the indicated cell speed comparisons and a Fisher's exact for durotactic frequencies for the indicated  
42 comparisons.  
43

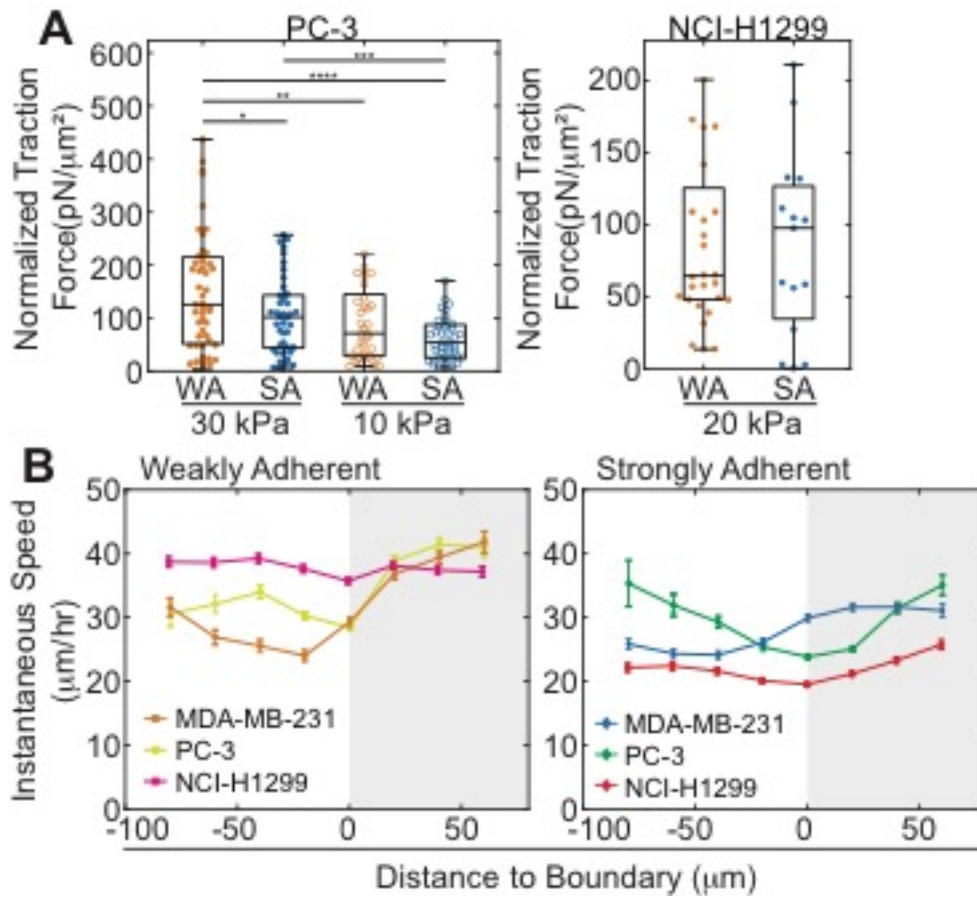

45

46 **Supplemental Figure S2: Traction forces and instantaneous speed for PC-3 and NCI-H1299 cells,**47 **Related to Figure 2. (A)** Traction force, normalized to cell area, plotted for PC-3 cells on soft or stiff

48 single-modulus (left) hydrogels and NCI-H1299 cells on stiff hydrogels (right). Data is shown for weakly

49 (orange) vs. strongly (blue) adherent cells, and open circles for PC-3 cells on soft ( $n > 47$  for PC-3,  $n > 15$  for50 NCI-H1299). \* $p < 0.05$ , \*\* $p < 0.01$ , \*\*\* $p < 0.001$ , and \*\*\*\* $p < 0.0001$  via one-way ANOVA with Tukey test for51 multiple comparisons for the indicated comparisons. **(B)** Instantaneous cell speed is plotted as a

52 function of position relative to the step-gradient for adhesion sorted weakly (left) and strongly (right)

53 adherent MDA-MB-231 (orange/blue), PC-3 (yellow/green), and NCI-H1299 (pink/red) cells. Negative

54 values are on the soft substrate and positive are on the stiff. Average speed  $\pm$  standard error of the55 mean is plotted for  $n > 144$  cells for each condition from triplicate experiments.

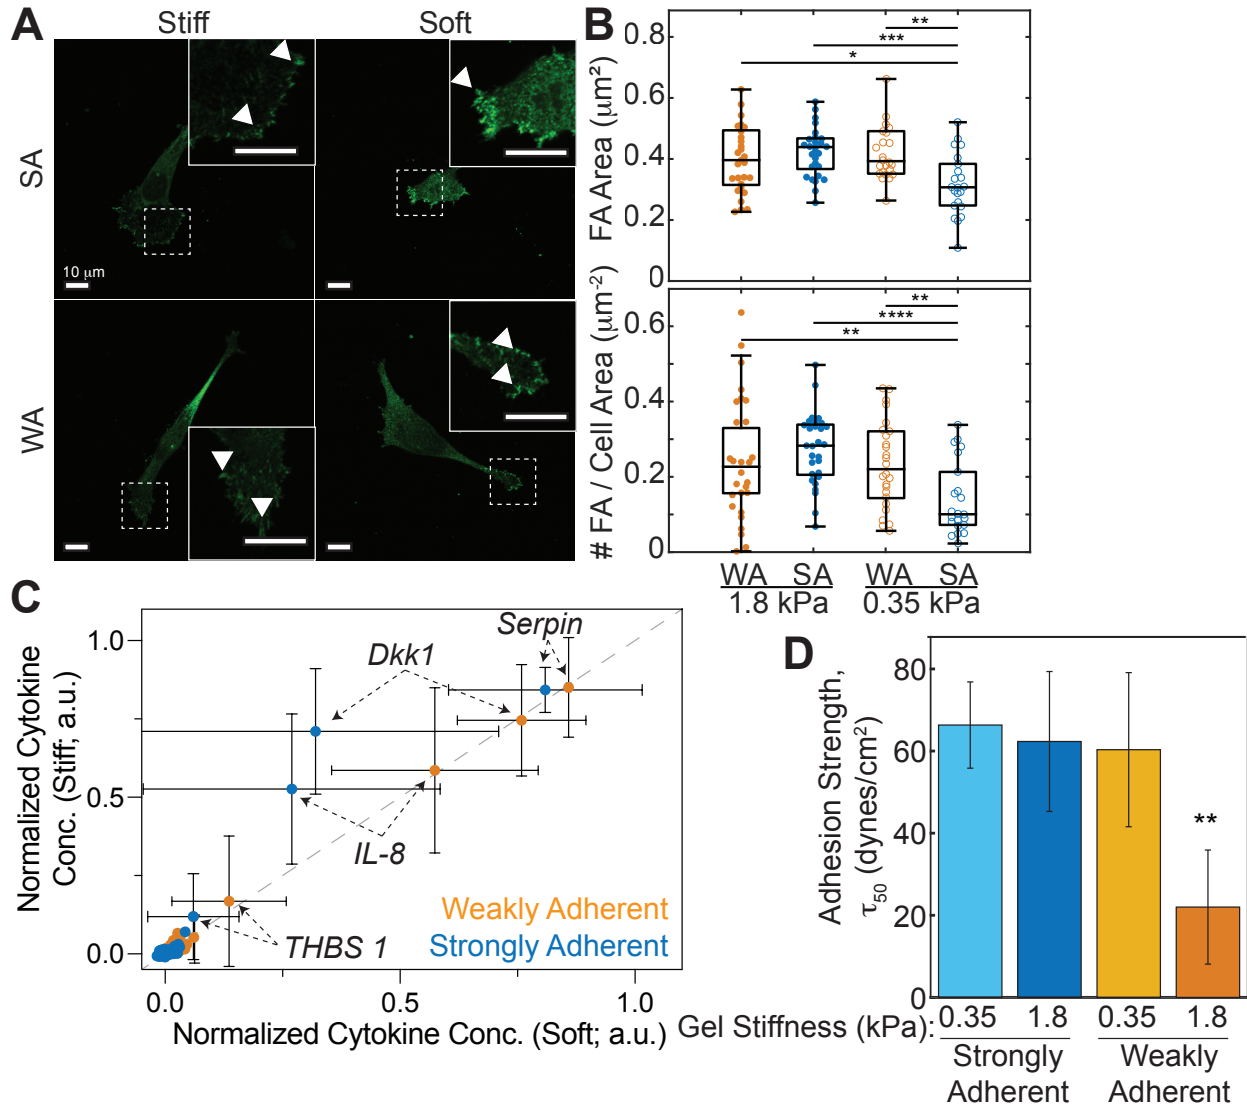

56

57 **Supplemental Figure S3: Effects of Focal adhesions, Cytokines, and Stiffness on Adhesion, Related to**

58 **Figure 2. (A)** Representative images of FAs in weakly and strongly adherent MDA-MB-231 cells on soft or

59 stiff single modulus hydrogels. Paxillin is shown in green and highlighted in the inset images (dashed

60 boxes indicating which regions are magnified) by arrowheads that point to representative paxillin

61 adhesions. Scale bar is 10  $\mu\text{m}$ . **(B)** FA area (top) and number of FAs normalized to cell area (bottom) are

62 plotted for the indicated sorting and elasticities.  $n > 20$  cells/condition from triplicate experiments. **(C)**

63 Cytokine expression for WA and SA cells, normalized to loading controls, is plotted  $\pm$  standard deviation

64 for 105 cytokines found in cell culture media collected from WA (orange) and SA (blue) MDA-MB-231

65 cells plated onto soft (0.35 kPa) and stiff (1.8 kPa) hydrogels for 24 hours. Specific cytokines expressed  
66 above background noise are noted with corresponding error bars from triplicate media collections;  
67 dashed arrows link cytokine names with their respective data. No data was statistically different  
68 between substrate stiffness or adhesion mechanotype based on one-way ANOVA with Tukey test for  
69 multiple comparisons. **(D)** Post-selection weakly and strongly adherent MDA-MB-231 cells were plated  
70 onto hydrogels of indicated stiffness and subjected to a shear stress gradient. Adhesion strength or  $\tau_{50}$ ,  
71 i.e. the shear stress at which 50% of the population detaches from the substrate, is plotted  $\pm$  standard  
72 deviation. \* $p < 0.05$ , \*\* $p < 0.01$ , \*\*\* $p < 0.001$ , and \*\*\*\* $p < 0.0001$  via one-way ANOVA with Tukey test for  
73 multiple comparisons for the indicated comparisons.

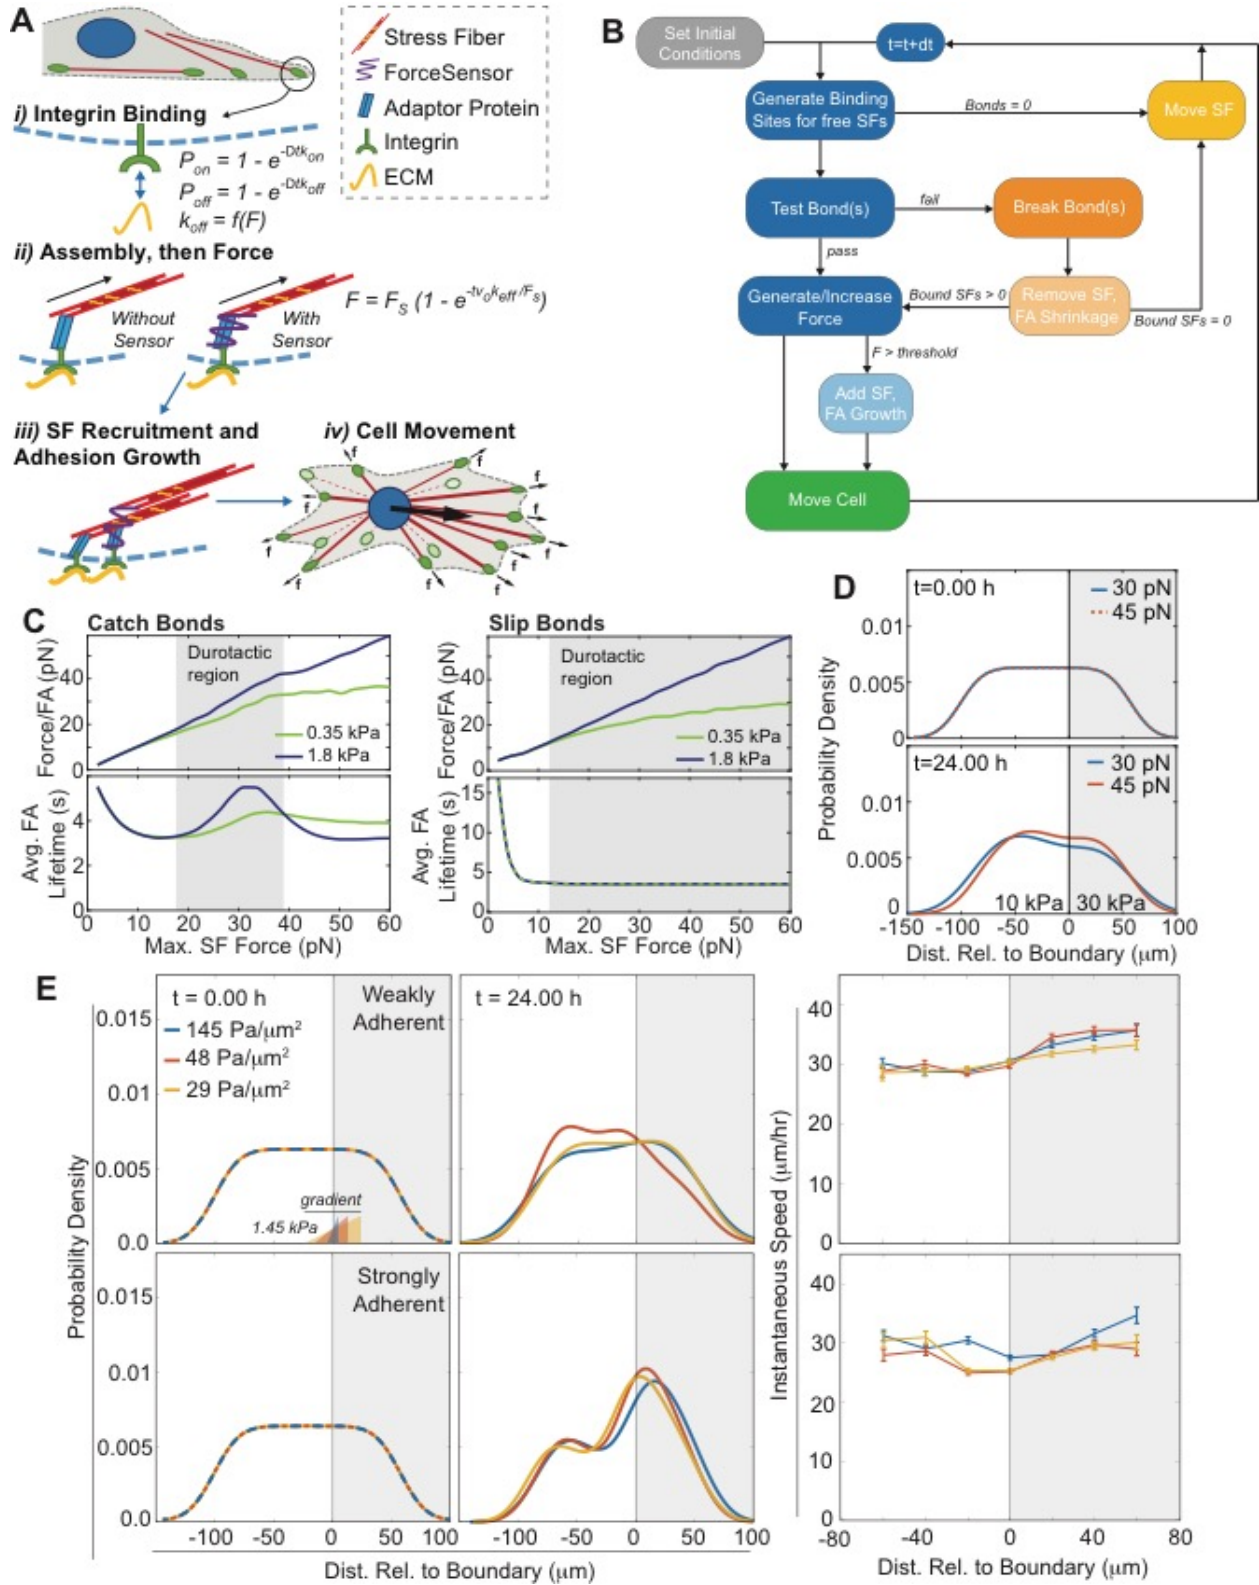

74

75 **Supplemental Figure S4: Computational Model Schematic and it's Sensitivity to Stiffness Range and**

76 **Gradient Strength, Related to Figure 3. (A) Schematic of rigidity sensing in cells where softer catch**



77 bonds, i.e. strongly adherent cells, leads to asymmetric adhesion maturation at the step-gradient  
78 whereas stiffer bonds in weakly adherent cells break and prevent rigidity sensing. This occurs in four  
79 phases: i) integrin binding, ii) assembly and force production, iii) adhesion growth and stress fiber  
80 recruitment, and iv) cell movement. **(B)** Diagram indicates the decision logic for the computational  
81 durotaxis model described in Figures 2 and 3. Gray indicates initial conditions, which feed in to the force  
82 on adhesions equations (blue). Adhesion outcomes are shown in orange with cell migration shown in  
83 green. Arrows indicate the decision logic with notes about each pathway indicated above or to the side  
84 of the decision. **(C)** Comparison of catch (left) and slip (right) bond dynamics, Force/FA (top) and average  
85 FA lifetime (bottom) as a function of max SF force for ECM stiffnesses fixed at 0.35 or 1.8 kPa (green and  
86 blue, respectively). The gray region highlights where force is greater and bond lifetime is also greater or  
87 equal than it is on soft, which corresponds to the onset of durotactic behavior. **(D)** Model cell durotaxis  
88 on gradients with a different stiffness range at 0 and 24 hours, model cell probability density versus  
89 simulated hydrogel position is shown for cells with 45 pN (orange) vs. 30 pN (blue) max SF force. The  
90 stiffer region is shaded in gray (30 kPa) vs. the softer region in white (10 kPa); values were chosen to  
91 mirror prostate tumor gradients rather than mammary tumor gradients to which model parameters  
92 were otherwise tuned. **(E)** Model cell durotaxis on gradients of different magnitude but same stiffness  
93 range. (Left) At 0 and 24 hours, model cell probability density versus simulated hydrogel position is  
94 shown for cells with 45 pN (Weakly Adherent) vs. 30 pN (Strongly Adherent) max SF force. The stiffer  
95 region is shaded in gray (1.8 kPa) vs. the softer region in white (0.35 kPa); gradient slope was changes as  
96 indicated. All previous simulations use  $145 \text{ Pa}/\mu\text{m}^2$  (blue) but plots here also include gradients 3- (dark  
97 orange) and 5-fold shallower (light orange). (Right) Instantaneous cell velocities  $\pm$  S.E.M. for the  
98 indicated gradients and WA (top) or SA (bottom).

## Supplementary Tables

| Parameter    | Description                              | Value                                                            | Source                                                     |
|--------------|------------------------------------------|------------------------------------------------------------------|------------------------------------------------------------|
| $\mu_{SF}$   | Average assembly sites/cell              | Adjustable, 50                                                   | (Elosegui-Artola et al., 2014)                             |
| $v_{act\_L}$ | Actin assembly, leading edge             | $0.2 \mu\text{m s}^{-1}$                                         | (Pollard, 1986; Prah et al., 2020; Vavylonis et al., 2005) |
| $v_{act\_T}$ | Actin assembly, trailing edge            | $0.1 \mu\text{m s}^{-1}$                                         | (Pollard, 1986; Prah et al., 2020; Vavylonis et al., 2005) |
| $v_{ret}$    | Actin disassembly velocity               | $0.5 \mu\text{m s}^{-1}$                                         | (Vavylonis et al., 2005)                                   |
| $t_{ret}$    | Retraction Time                          | 10 s                                                             | (Bosgraaf and Van Haastert, 2009b, 2009a)                  |
| $D_{rot}$    | Rotational diffusion constant of F-actin | Calculated, $\text{s}^{-1}$                                      |                                                            |
| $k_B$        | Boltzmann's constant                     | $1.3806\text{E-}23 \text{ kg m}^2 \text{ s}^{-2} \text{ K}^{-1}$ |                                                            |
| T            | Temperature                              | 310.15 K                                                         |                                                            |
| L            | Length of actin filament                 | Calculated, $\mu\text{m}$                                        |                                                            |
| $d_{act}$    | Diameter of Actin                        | 7 nm                                                             | (Cooper, 2000)                                             |
| $\eta$       | Cytoplasm (water) viscosity @ 37C        | 0.0006913 Pa s                                                   |                                                            |
| $K_{on}$     | Integrin-SF assembly rate                | $0.1 \text{ s}^{-1}$                                             | (Bidone et al., 2019; Vicente-Manzanares et al., 2009)     |
| $\mu_{Int}$  | Average Integrins/F-actin                | 1                                                                | (Blystone, 2004)                                           |
| $P_{tal}$    | Probability of force-sensor protein      | 0.7                                                              | (Himmel et al., 2009)                                      |
| $k_{off}$    | Unbinding rate                           | Calculated, $\text{s}^{-1}$                                      |                                                            |
| A            | Fitting constant                         | 3.309                                                            |                                                            |
| B            | Fitting constant                         | 0.0003942                                                        |                                                            |
| C            | Fitting constant                         | 58.19                                                            |                                                            |
| $\xi$        | Unbinding length                         | 0.7959 nm                                                        | (Kong et al., 2009)                                        |
| $k_0$        | Unloaded off rate                        |                                                                  |                                                            |
| $F_b$        | Bond rupture force                       |                                                                  |                                                            |
| $F_S$        | Max filament force                       | $F_{myo} \times n_{myo}$                                         |                                                            |
| $F_{myo}$    | Myosin Motor Force                       | 2 pN                                                             | (Molloy et al., 1995)                                      |
| $n_{myo}$    | # of Myosin Motors/F-actin               | Adjustable, 10-25                                                | (Cooper and Hausman, 2007)                                 |
| $v_0$        | Myosin sliding velocity                  | $1 \mu\text{m s}^{-1}$                                           | (Brizendine et al., 2015)                                  |
| $K_{ECM}$    | ECM stiffness                            | ECM modulus x 0.1 $\mu\text{m}$                                  | length scale typical for myosin sensing                    |
| $E_{stiff}$  | Young's modulus, Stiff                   | 1800 Pa, Measured experimentally                                 |                                                            |
| $E_{soft}$   | Young's modulus, Soft                    | 350 Pa, Measured experimentally                                  |                                                            |
| $L_{grad}$   | Gradient Length                          | 10 $\mu\text{m}$ , from AFM measurements                         |                                                            |
| $F_{thres}$  | Force sensor threshold                   | 1 pN                                                             | (Grashoff et al., 2010; Rio et al., 2009)                  |
| $K_{act}$    | Actin-Talin assembly rate                | $1 \text{ s}^{-1}$                                               | (Tapia-Rojo et al., 2020)                                  |
| $n_{SF}$     | Maximum SFs/FA                           | Adjustable, 100                                                  | (Prah et al., 2020)                                        |
| $\Pi$        | Bond friction factor                     | $2 \times 10^{-5} \text{ kg s}^{-1}$                             | (Pompe et al., 2011)                                       |

100 **Supplementary Table S1: Model parameters for the cell durotaxis model, Related to STAR Methods.**

101 Parameters are listed in order of appearance in methods section. Note that for Figure S7,  $E_{\text{stiff}}$  and  $E_{\text{soft}}$

102 were changed as indicated.
