# Supplementary material for: Adhesion strength and contractility enable metastatic cells to become adurotactic
Source: PubMed Central journal article supplement — Cell Rep. Author manuscript; Available in PMC 2021 Mar 27. (PMC7997775; doi:10.1016/j.celrep.2021.108816), 2021-03-09
Supplement: NIHMS1683087-supplement-9.pdf [file NIHMS1683087-supplement-9.pdf]

## Adhesion strength and contractility enable metastatic cells to become adurotactic

### Graphical Abstract

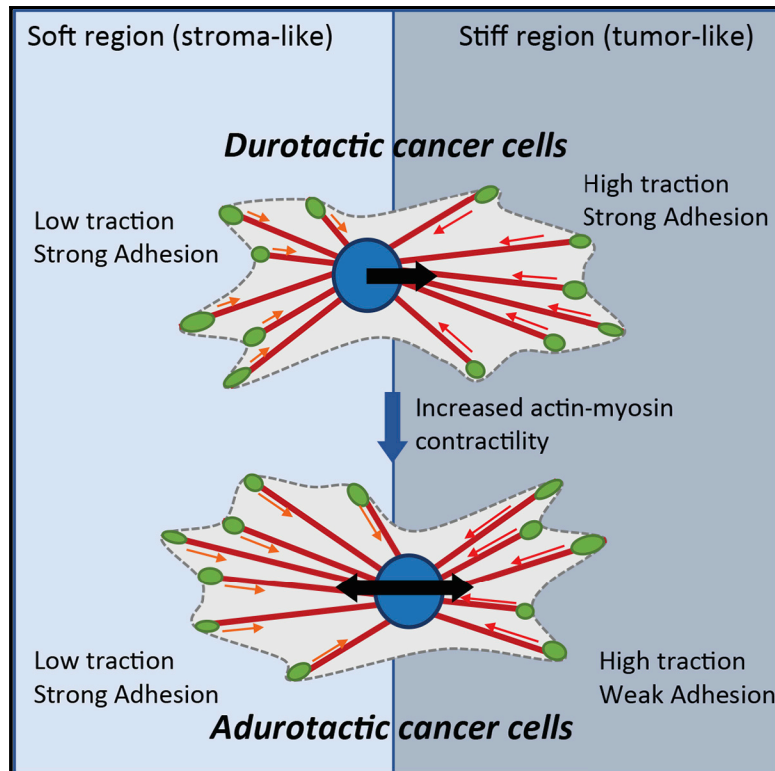

### Authors

Benjamin Yeoman, Gabriel Shatkin, Pranjali Beri, Afsheen Banisadr, Parag Katira, Adam J. Engler

### Correspondence

pkatira@sdsu.edu (P.K.), aengler@ucsd.edu (A.J.E.)

### In brief

The biomechanics of how a metastatic cell navigates away from a primary tumor is not well known. Using a combination of experimental and computational models, Yeoman et al. show that increased actomyosin activity and cell contractility play a primary role in cells migrating against stiffness gradients.

### Highlights

- Cell contractility is a main driver for rigidity sensing and directional migration
- Cell-adhesion strength and contractility are intrinsically linked
- Less contractile cells are more likely to migrate toward stiffer substrates
- More contractile cancer cells exhibit adurotaxis in their tumor-specific niche

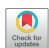

## Report

# Adhesion strength and contractility enable metastatic cells to become adurotactic

Benjamin Yeoman,<sup>1,3</sup> Gabriel Shatkin,<sup>1</sup> Pranjali Beri,<sup>1</sup> Afsheen Banisadr,<sup>2</sup> Parag Katira,<sup>3,4,\*</sup> and Adam J. Engler<sup>1,2,5,6,\*</sup><sup>1</sup>Department of Bioengineering, University of California, San Diego, La Jolla, CA 92093, USA<sup>2</sup>Biomedical Sciences Program, University of California, San Diego, La Jolla, CA 92093, USA<sup>3</sup>Department of Mechanical Engineering, San Diego State University, San Diego, CA 92182, USA<sup>4</sup>Computational Sciences Research Center, San Diego State University, San Diego, CA 92182, USA<sup>5</sup>Present address: Sanford Consortium for Regenerative Medicine, La Jolla, CA 92037, USA<sup>6</sup>Lead contact\*Correspondence: [pkatira@sdsu.edu](mailto:pkatira@sdsu.edu) (P.K.), [aengler@ucsd.edu](mailto:aengler@ucsd.edu) (A.J.E.)<https://doi.org/10.1016/j.celrep.2021.108816>

## SUMMARY

Significant changes in cell stiffness, contractility, and adhesion, i.e., mechanotype, are observed during a variety of biological processes. Whether cell mechanics merely change as a side effect of or driver for biological processes is still unclear. Here, we sort genotypically similar metastatic cancer cells into strongly adherent (SA) versus weakly adherent (WA) phenotypes to study how contractility and adhesion differences alter the ability of cells to sense and respond to gradients in material stiffness. We observe that SA cells migrate up a stiffness gradient, or durotax, while WA cells largely ignore the gradient, i.e., adurotax. Biophysical modeling and experimental validation suggest that differences in cell migration and durotaxis between weakly and strongly adherent cells are driven by differences in intra-cellular actomyosin activity. These results provide a direct relationship between cell phenotype and durotaxis and suggest how, unlike other senescent cells, metastatic cancer cells navigate against stiffness gradients.

## INTRODUCTION

Durotaxis is a form of directional cell migration in which cells respond to and move toward extracellular regions of increasing stiffness (DuChez et al., 2019; Lo et al., 2000). Durotactic migration has been observed in a large number of migratory cells of mesenchymal lineage and is almost universally reported to occur in both 2D and 3D environments in the direction of increasing stiffness (DuChez et al., 2019; Joaquin et al., 2016; Novikova et al., 2017), with some speculation that it may occur in reverse (Isomursu et al., 2020; Singh et al., 2014). While multi-que migrational responses may occur *in vivo* (Lara Rodriguez and Schneider, 2013), as the majority of tumors progress, their microenvironment gradually becomes stiffer than the surrounding stroma (Lachowski et al., 2017; McKenzie et al., 2018). This suggests that the ability to move against stiffness gradients seems to be highly relevant at least in some cancers. Therefore, a breakdown in the normal processes regulating durotaxis may contribute to cancer cells developing different sensitivities to stiffness gradients leading to an increase in metastatic potential.

Several mechanisms have been proposed for the molecular basis of durotaxis (Sawada et al., 2006; Sunyer et al., 2016), but how and when these molecular interactions are transduced into a directed force along or against a stiffness gradient is unclear. Computational and mathematical models have bridged gaps in our understanding of how cell mechanics and the

microenvironment affect the speed, persistence (Danuser et al., 2013; Holmes and Edelstein-Keshet, 2012; Kim et al., 2018; Mak et al., 2017; Schlüter et al., 2012; Yeoman and Katira, 2018), and emergent behaviors such as durotaxis (Feng et al., 2019; Mak et al., 2015; Novikova et al., 2017; Stefanoni et al., 2011). However, a number of these models make additional *a priori* assumptions about how intra-cellular processes are differentially affected by stiffness in order to show durotactic behavior (Shatkin et al., 2020). Additionally, co-occurrence of durotaxis, adurotaxis, or anti-durotaxis in similar cell populations, as might occur in metastatic tumors, is difficult to explain by current models.

We hypothesize that mechanotypic heterogeneity across and within cell populations might be responsible for differential durotactic behavior in these populations. In recent work, we found that adhesion strength acted as a physical marker that sorted isogenic cells into weakly and strongly adhesive cell groups that were more versus less contractile and migratory (Beri et al., 2020), respectively. RNA sequencing further showed transcriptional differences characteristic of distinct mechanotypes that sorted patient outcomes in The Cancer Genome Atlas (TCGA); patients with the weakly adhesive gene signatures relapsed at a rate 2-fold higher than the strongly adhesive gene signatures. Such differences could contribute to durotactic differences not previously observed, and here we show that mechanotypic differences are the proximate driver for differential rigidity sensing and adurotactic behavior.

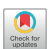

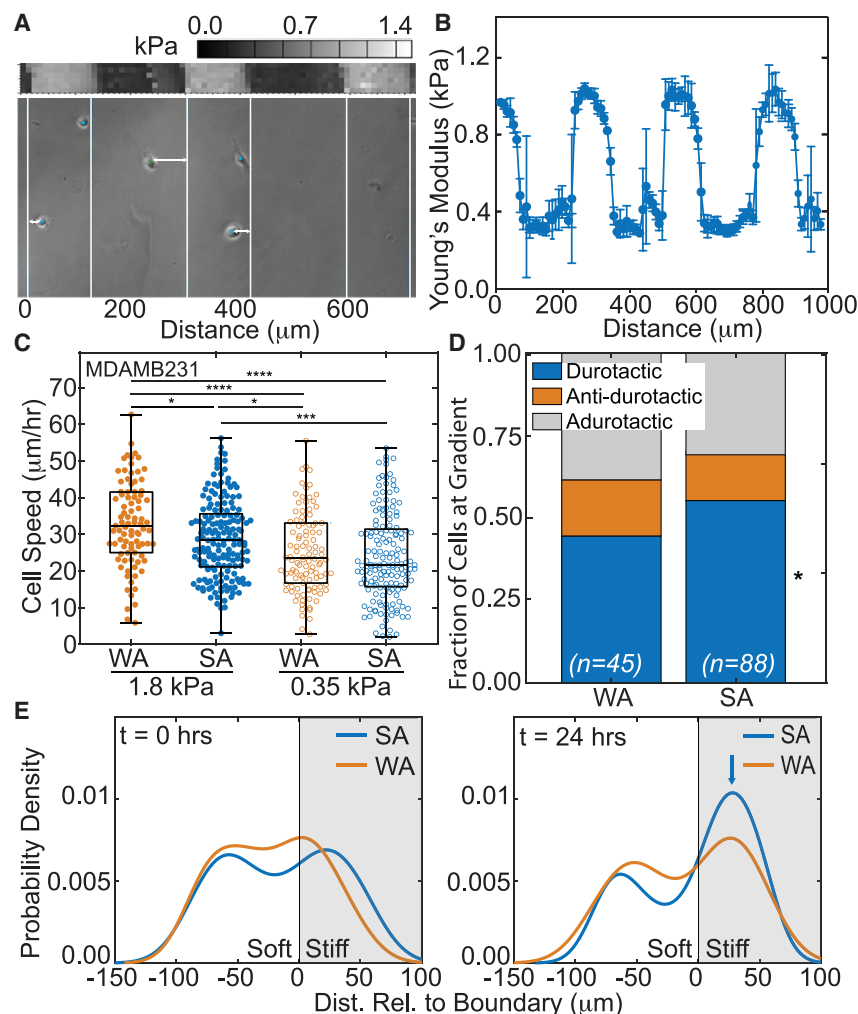

**Figure 1. Weakly adherent cells exhibit higher adurotactic behavior**

(A) Bright-field image of cells (dots) with lines to indicate transitions between soft and stiff substrate regions of step-gradient hydrogels (bottom). Double-headed arrows indicate the distance relative to the closest gradient or boundary. Atomic force microscopy (AFM) map is also shown (center) with corresponding color map (top). Position is indicated in micrometers.

(B) Plot of average substrate stiffness versus position for step-gradient hydrogels ( $n > 3$ ). Error bars represent standard deviation.

(C) MDA-MB-231 cell speed on soft or stiff side of step-gradient hydrogels is plotted. Data are shown for cells sorted by adhesion strength, i.e., weakly (orange) versus strongly (blue), and cells on softer (open) versus stiffer (closed) regions. ( $n > 144$  cells for each condition from triplicate experiments). \* $p < 0.05$ , \*\*\* $p < 10^{-3}$ , \*\*\*\* $p < 10^{-4}$  were determined by one-way ANOVA with Tukey test for multiple comparisons for the indicated comparisons.

(D) For adhesion-sorted MDA-MB-231 cells that encounter the step gradient, the fraction of durotactic, anti-durotactic, and adurotactic behavior is plotted. Data represent  $n = 45$  of 144 WA cells and 88 of 237 cells that crossed the gradient over triplicate experiments. Comparisons made using a Fisher's exact test for the same migration behavior between WA and SA cells, \* $p < 0.05$ .

(E) At 0 and 24 h, probability density function of MDA-MB-231 cell distribution (calculated using the unbounded kernel density function) versus hydrogel position is shown for weakly (orange) versus strongly (blue) adherent cells from triplicate experiments. The stiffer region is shaded in gray. Blue arrow indicates a peak in the strongly adherent cell distribution at 24 h.

## RESULTS

### Adhesion dynamics define an adurotactic phenotype

Here, we report that weakly adherent populations of various types of cancers cells are significantly less durotactic than their strongly adherent counterparts, potentially explaining how tumor cells migrate down stiffness gradients. Using the parallel plate flow chamber (PPFC) (Berl et al., 2020), cells are isolated based on adhesion strength and seeded onto photopatterned hydrogels with alternating soft and stiff elasticity profiles that match Young's moduli of softer stromal and stiffer tumor extracellular matrix (ECM) for each type of cancer (Figures 1A and 1B), i.e., 0.3 and 1.5 kPa for mammary (Cox and Epler, 2011; Paszek et al., 2005), 4 and 20 kPa for lung (Burgstaller et al., 2017; Pankova et al., 2019; White, 2015), and 10 and 30 kPa for prostate (Ahn et al., 2010; Krupski et al., 2010; Zhai et al., 2010). When cells were plated on these gradients and observed by time-lapse video microscopy (Videos S1, S2, and S3), we found that strongly adherent (SA) cells on average migrate significantly slower than their weakly adherent (WA) counterparts for mammary,

lung, and prostate cancer cell lines (Figure 1C; Figure S1A) on stiff substrates, and slightly slower on softer substrates. Although slower, SA cells for each cell type were more likely to durotax and less likely to undergo adurotaxis than WA subpopulations (Figure 1D; Figure S1B); quantitatively, the durotactic odds ratio is calculated as the ratio of the odds that a SA cell is durotactic to the odds that a WA cell is durotactic. We found that this ratio was between 1.75 and 3 for durotaxis. Conversely for adurotaxis, that ratio was between 0.66 and 0.33 across all cell lines, which indicates that SA cells durotax and WA cells adurotax. Consistent with phenotype differences, we observe accumulation only of the SA cells over 24 h in culture on patterned substrates as SA cells moved from a random distribution to one biased toward stiffer regions (Figure 1E; Figure S1C; Video S4). These behaviors again are largely conserved across cell lines from multiple tumor types, albeit with varying degrees of effect such that accumulation is most robust for a mammary cell line. While the effects are the same, variability may be due in part to inherent mechanotype differences. For example, cells sort into WA and SA subpopulations at different shear stress in

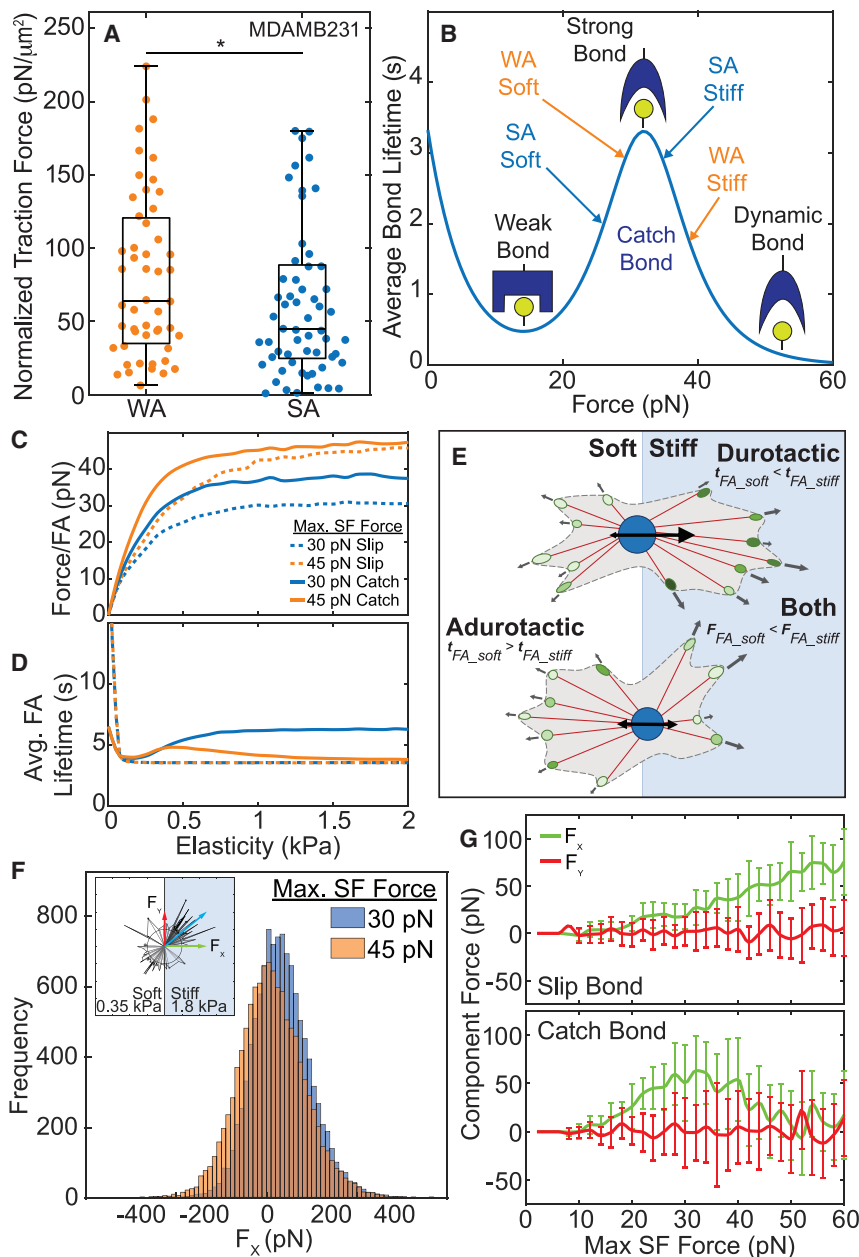

**Figure 2. Higher forces on catch bonds leads to adurotactic behavior**

(A) Traction force, normalized to cell area, is plotted for MDA-MB-231 cells on single-modulus hydrogels. Data are shown for weakly (orange) versus strongly (blue) adherent cells, ( $n > 50$ ).  $*p < 0.05$  was determined by one-way ANOVA with Tukey test for multiple comparisons.

(B) Schematic of bond lifetime versus force with bond states for weakly (orange) versus strongly (blue) adherent cells as used in the computational model.

(C) Force/FA versus substrate elasticity for catch (solid lines) and slip bonds (dashed lines) comparing 30 pN max SF force (blue) and 45 pN max SF force (orange), predicted by computational model.

(D) Average FA lifetime plotted versus substrate elasticity for the same simulations.

(E) Schematic of cells migrating over a step gradient. For durotactic cells, higher tractions and longer bond lifetimes on the stiff side drive adhesion maturation and net migration toward the stiffer substrate. For adurotactic cells, tractions balance across the boundary due to longer bond lifetimes on the soft side of the step gradient.

(F) Histogram of all X component forces simulated over 1 h for a cell fixed at a step gradient, comparing 30 pN max SF force (blue) and 45 pN max SF force (orange). Inset shows model cell with protruding stress fibers and X component force (green arrow), Y component force (red arrow), and resultant force (blue arrow).

(G) X and Y component forces versus max SF force for slip bonds (top) and catch bonds (bottom) from the computational model. Colors match the arrows in inset for Figure 2E. Error bars represent standard deviation.

the PPFC; lung tumor cells are less adherent overall with the SA fraction sorting at  $>180$  dynes/cm<sup>2</sup>, while prostate and mammary lines require  $>500$  dynes/cm<sup>2</sup> to sort their SA fraction.

To understand what gives rise to mechanotype, we first measured traction forces across adhesion-sorted cell lines. We found that weakly adherent tumor cells exhibit higher traction forces—measured for prostate cell lines on both single modulus soft and stiff substrates (Figure S2A) and for mammary cell lines on single modulus stiff substrates mimicking their fibrotic niche (Figure 2A); the lung cell lines were generally less adherent, and thus we did not observe significant traction differences (Figure S2A). This general trend, however, may appear

while SA cell speed generally increases moving from softer to stiffer substrates (Figure S2B). This suggests possible traction force redistribution along the cell length for the WA cells as they move across the stiffness gradient. We also noted that focal adhesion sizes were stiffness dependent for SA cells, while focal adhesion sizes for WA were the similar on either stiffness (Figures S3A and S3B). These observations suggest that adurotaxis could arise from a lack of change in balance between adhesion dynamics, redistribution of traction forces across the stiffness gradient, or both. Conversely, what does not appear to regulate durotaxis are differences in cytokine expression; blotting of 105 cytokines showed only 4 that were expressed above background and none were differentially expressed (Figure S3C).

To test the above suggestions, we employed a focal adhesion maturation and traction force generation model dependent on catch bond dynamics between cell-adhesion proteins and the substrate (Figure 2B). In this model, polymerizing actin fibers bind to substrate bound adhesion proteins, mature into actin-myosin stress fibers (SFs) and focal adhesions (FAs), and generate traction forces between the cell and the substrate. The focal adhesions grow/shrink via addition/dissociation of individual integrin-substrate bonds and SF recruitment in a force-dependent manner. Stress fibers are limited by the maximum force that each one can generate, i.e., max SF force, and ideally corresponds to the myosin stall force of collectively contracting heads against the actin stress fiber; max SF force is reached exponentially as the stress fiber pulls against the substrate (Schwarz et al., 2006). The substrate stiffness in this model controls the rate of force increase in the stress fibers (Equation 5), which in turn alters the force generated in each stress fiber dependent on the associated integrin-substrate adhesion lifetime. The forces driving cell migration are obtained by vectorially summing forces in all the FA bound SFs within the cell at any given instant. Using this model, we compared the effect of integrin catch and slip bonds dynamics (Fusco et al., 2017) on the force per adhesion and on focal adhesion lifetimes as a function of substrate stiffness for cells with different max SF force (assigned from prior observations of SF force [Schwarz et al., 2006]). As a function of substrate stiffness, both catch and slip bonds show increased force per focal adhesion, with catch bonds generating and sustaining higher forces due to bond strengthening and recruitment of secondary stress fibers (Figure 2C). For focal adhesion lifetimes, lifetimes with slip bond dynamics remained constant across relevant substrate stiffness. For catch bonds, however, lower max SF forces saturated focal adhesion lifetimes at higher values whereas higher max SF forces exhibit a small peak near normal mammary stiffness and then drop to saturate at a lower value at higher stiffnesses (Figure 2D). These data suggest that max SF force and stiffness-dependent values for FA lifetimes optimize cell-migration forces for a given mechanotype. To test the predicted changes in adhesion lifetimes based on substrate stiffness, we applied a range of shear stress to cells cultured on substrates resembling normal and pathological mammary stiffness using a population-based adhesion assay (Boettiger, 2007). We found that cells selected on glass as weakly but not strongly adherent could modulate their average adhesion strength and become more adherent in softer conditions (Figure S3D). These results align with model predictions based on catch-bond dynamics between the cell-adhesion receptors and the substrate (solid lines in Figure 2D). Since average FA lifetime is more substrate stiffness sensitive for weakly adherent cells and identical to strongly adherent cells on softer substrates, these data suggest that weakly adherent cells are less adherent and primed to migrate on stiffer substrates with lower FA lifetimes. These correlations will next be explored in a cell-based model to understand mechanotype mechanisms.

#### Actomyosin contractility defines adhesion phenotype and explains migration behavior

In this model framework (Figures S4A and S4B), we compared a range of max SF forces, finding that 30 pN indeed corresponds to peak bond lifetime at high substrate stiffness but that at

higher max SF force, softer substrates experience longer bond lifetimes. We also found monotonically increasing force per adhesion for catch bonds, consistent with higher traction forces seen experimentally in WA cells (Figure 2A). Bond lifetimes were insensitive to stiffness for slip bonds, while force per adhesion increased monotonically as with catch bonds (Figure S4C). The relationship between average bond lifetime and substrate elasticity suggests that by increasing max SF force, a scenario could arise in which a cell's catch bonds are more stable adhesions on a softer substrate (Figure 2E). Stress fibers attached to those adhesion sites would have more time to pull a WA cell in the direction of the softer substrate, balancing numerous shorter-lived forces in focal adhesions on the stiffer region. To illustrate this, we fixed a cell at the step gradient interface and measured force generated parallel ( $F_x$ ) and perpendicular ( $F_y$ ) to the gradient. On average, cells with 30 pN max SF force had a positive  $F_x$ , indicating that the overall force on the cell is pulling it toward the stiffer substrate, whereas cells with 45 pN max SF force had neutral  $F_x$ , suggesting the cell would behave adurotactically (Figure 2F). This scenario requires cell-surface adhesions to behave as catch bonds, which appears reasonable (Kong et al., 2009; Morikis et al., 2017; Zhu and Chen, 2013). We would also note that when slip bond dynamics are used, it results in cells with higher max SF force to durotax (Figure 2G), which would be at odds with experimental results where WA cells are more contractile but less durotactic than SA cells.

The main input required for this model is the max SF force of the WA and SA mammary cells, but with this difference cell-migration speeds and traction forces match experimental observations with the small exception of migration speeds of SA cells on soft substrates, which go up slightly according to the model (Figures 3A and 3B; Videos S5 and S6). While a fine tuning of other model parameters can fix the disparity, we focus only on the effect of max SF force here and maintain other parameter values at those commonly found in literature. Additionally, just this difference in max SF force enables the model to correctly predict durotactic differences (Figure 3C) and the accumulation of SA cells on stiffer substrates versus uniform distribution of WA cells across the gradient over 24 h for mammary cells (Figure 3D; Video S7). Importantly, when substrate stiffness is altered to resemble the prostate cancer stiffness gradient (Ahn et al., 2010; Krupski et al., 2010; Zhai et al., 2010), mammary cell parameters (Table S1) cause SA cells to not durotax (Figure S4D). However, when substrate stiffness range is maintained, i.e., 0.35 to 1.8 kPa, but the gradient made more shallow, we do not observe changes in cell accumulation on the stiff region of the substrate for SA cells; i.e., they continue to durotax; for WA cells under the same conditions, they still fail to accumulate (Figure S4E). Thus, it would appear that durotactic and adurotactic behaviors may not be very sensitive to gradient magnitude but rather the mere presence of a gradient.

#### Adurotactic phenotype is titratable by myosin activity

The dependence of durotaxis on a change max SF forces implies that the number of active myosin motors per SF filament could affect behavior; prior work suggests that such differences could

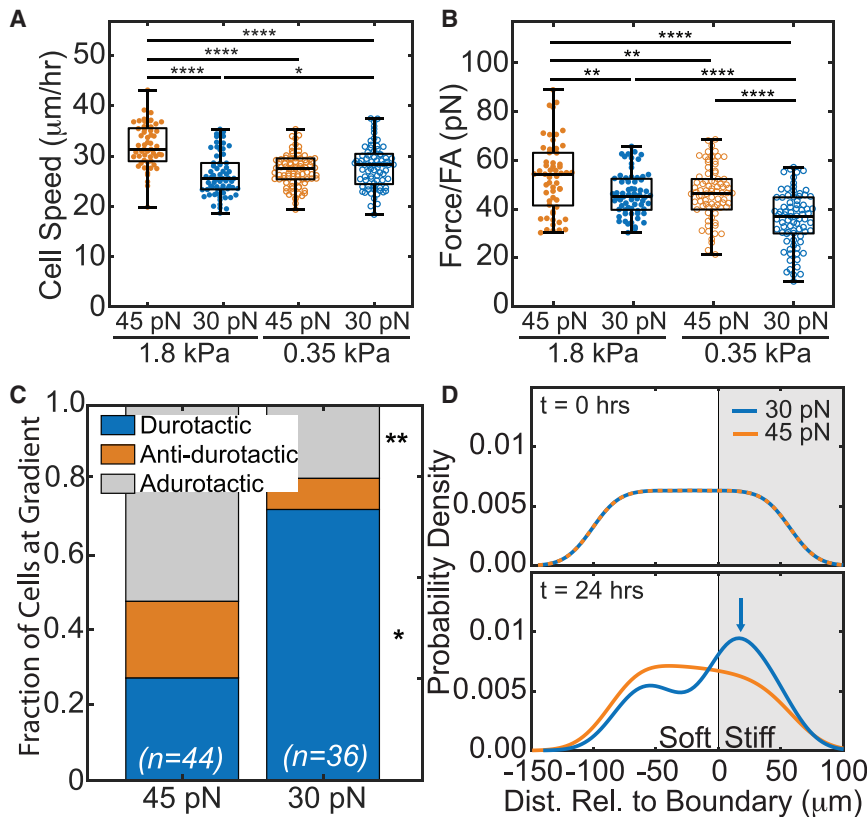

**Figure 3. Differential bond stiffness affect tractions to induce adurotaxis**

(A) Model cell speed on simulated on soft or stiff side of step gradient is plotted. Data are shown for cells of differing max SF force, i.e., 45 pN (orange) versus 30 pN (blue), and cells on softer (open) versus stiffer (closed) regions. ( $n = 100$  cells for each simulation).

(B) Average traction force per focal adhesion, as determined from the computational model, is plotted for 45 pN (orange) and 30 pN (blue) max SF force ( $n = 100$  cells for each condition). \* $p < 0.05$ , \*\* $p < 10^{-2}$ , \*\*\* $p < 10^{-3}$ , \*\*\*\* $p < 10^{-4}$  were determined by one-way ANOVA with Tukey test for multiple comparisons for the indicated comparisons in (A) and (B).

(C) For model cells that encounter the step gradient, the fraction of durotactic, anti-durotactic, and adurotactic behavior is plotted. Data represent  $n = 44$  of 100 and 36 of 100 cells simulated at 45 and 30 pN, respectively; those not counted did not interact with the gradient. Comparisons made using a Fisher's exact test for the same migration behavior between 30 and 45 pN conditions, \* $p < 0.05$  and \*\* $p < 0.01$ .

(D) At 0 and 24 h, the model probability density function (PDF) of cell distribution versus simulated hydrogel position is shown for cells with 45 pN (orange) versus 30 pN (blue) max SF force. The stiffer region is shaded in gray. Blue arrow indicates a peak in the 30 pN cell distribution at 24 h. \* $p < 0.05$ , \*\* $p < 10^{-2}$ , \*\*\*\* $p < 10^{-4}$  were determined by paired Student's t test for the indicated comparisons unless otherwise stated.

impart control over cell migration and stiffness (Koenderink et al., 2009). To validate such control in our system, we reduced the number of active myosin motors within a cell, i.e., SF force, finding that it increases the durotactic tendency of cells as predicted by the model between 30 and 45 pN (Figure 4A). Furthermore, we tested this experimentally by inhibiting the myosin II activity of WA mammary cells with blebbistatin. Cell speed decreased for blebbistatin treated cells on soft and stiff substrates (Figure 4B), resulting in similar velocities as untreated SA cells. Furthermore, treated cells are 2-fold more likely to migrate from the soft substrate into the stiff substrate and much less likely to exhibit antidurotactic migration (Figure 4C). WA mammary cells also showed a dose-dependent response to blebbistatin treatment, wherein the WA phenotype became more durotactic, resembling the durotactic behavior of SA cells (Figure 4D). Conversely, SA mammary cells also showed a dose-dependent response to lysophosphatidic acid treatment, wherein the SA phenotype became less durotactic, resembling the adurotactic behavior of WA cells (Figure 4E). These data confirm the suggestion that max SF force, as produced by the number of active myosin motors per SF filament, enables WA cells to exhibit less durotaxis and is a mechanical argument for why WA cells metastasize.

## DISCUSSION

The findings of this work help explain how a metastatic cell's distinct mechanotype correlates to the paradoxical migration

down a stiffness gradient that occurs during cancer metastasis. Cancer cells isolated by their adhesion strength from a seemingly isogenic population exhibit consistent behavior across different cell lines from vastly different cancer types; moreover, each cancer type exhibits adurotaxis in their tumor-specific niche, which change dramatically for step gradient strength (between 3- and 5-fold) and gradient range (from 0.3 to 30 kPa). Despite these differences, greater contractility in weakly adherent cells is conserved and led to decreased durotactic behavior that is not directly governed by lack of rigidity sensing, as evidenced by slow down at the gradient boundary. From previous work, RNA sequencing shows a distinct underlying phenotype for weakly versus strongly adherent cells with differences in cytoskeletal protein expression, which relates to decreased progression-free and disease-free intervals when compared to the gene expression signatures of human patients (Berl et al., 2020). A weakly adherent cell's ability to migrate against stiffness gradients connects this observation to the material properties of the niche, which contribute to its increased metastatic potential.

Computational modeling suggests that mechanotype differences in weakly and strongly adherent cells arises from increased contractility. Furthermore, it demonstrates that catch bonds are a necessary component for the diverging migratory behaviors seen in metastatic cells. Interestingly, catch-bond dynamics have been largely left out of most cell-migration and FA dynamics models until recently (Tan et al., 2020). Additionally, the model is able to simulate cells that exhibit both durotaxis and adurotaxis without relying on any *a priori* assumptions about

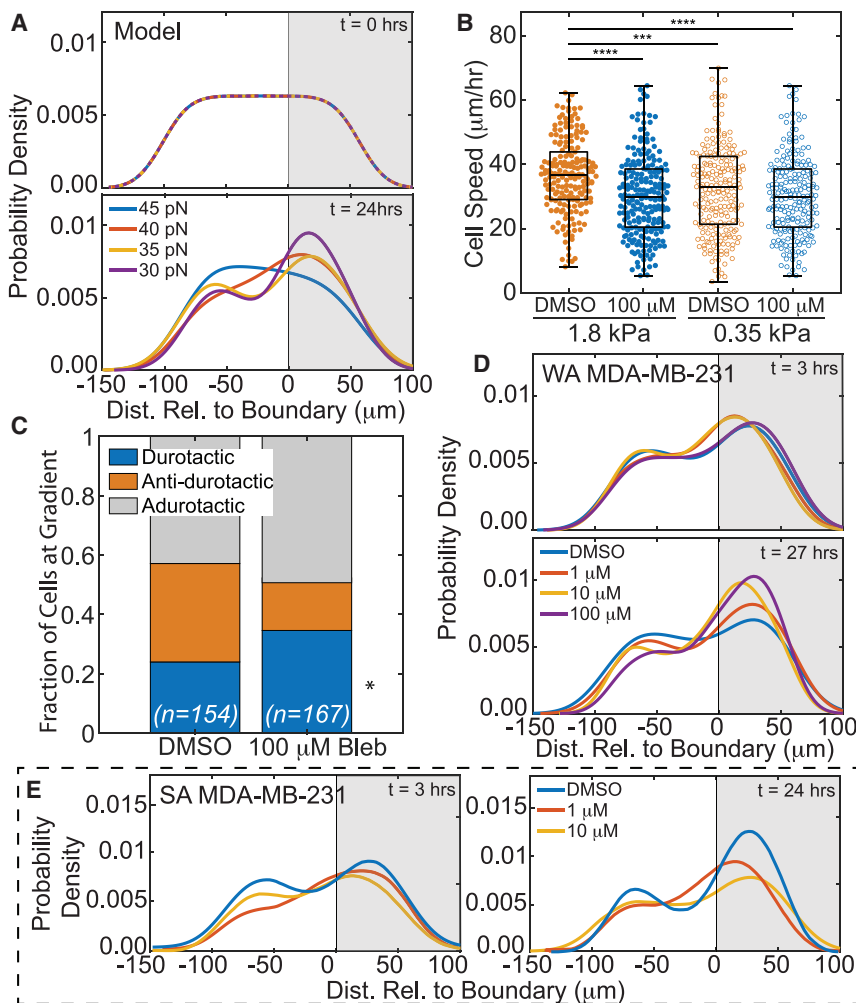

**Figure 4. Tuning contractility modulates adurotaxis in adhesion-sorted cells**

(A) Model PDF of cell distribution versus simulated hydrogel position as predicted for 30 (purple), 35 (yellow), 40 (red), and 45 pN (blue) max SF forces at  $t = 0$  and  $t = 24$  h. Durotactic tendency increased with decreasing max SF force.

(B) Weakly adherent MDA-MB-231 cell speed on soft or stiff side of step-gradient hydrogels for cells is plotted. Data are shown for blebbistatin-treated and nontreated cells, i.e., DMSO (orange) versus 100  $\mu\text{M}$  (blue), and cells on softer (open) versus stiffer (closed) regions. ( $n > 245$  cells for each condition from triplicate experiments).  $***p < 10^{-3}$ ,  $****p < 10^{-4}$  were determined by one-way ANOVA with Tukey test for multiple comparisons for the indicated comparisons.

(C) For treated and nontreated weakly adherent MDA-MB-231 cells that encounter the step gradient, the fraction of durotactic, anti-durotactic, and adurotactic behavior is plotted. Data represent  $n = 154$  of 256 DMSO-treated and 167 of 245 blebbistatin-treated cells over triplicate experiments; those not counted did not interact with the gradient. Comparisons were made using a Fisher's exact test for the same migration behavior between treated and DMSO,  $*p < 0.05$ .

(D) Weakly adherent MDA-MB-231 PDF of cell distribution was plotted versus hydrogel position for blebbistatin treatment of 100  $\mu\text{M}$  (purple), 10  $\mu\text{M}$  (yellow), 1  $\mu\text{M}$  (red), or DMSO (blue) at  $t = 3$  and  $t = 27$  h.

(E) Strongly adherent MDA-MB-231 PDF of cell distribution was plotted versus hydrogel position for LPA treatment of 10  $\mu\text{M}$  (yellow), 1  $\mu\text{M}$  (red), or DMSO (blue) at  $t = 3$  and  $t = 24$  h.

in cell contractility are so effective at reducing invasion and metastasis. Yet tumors are heterogeneous and likely

how rigidity sensing mechanisms are uniquely dependent on substrate stiffness (Novikova et al., 2017). Actomyosin activity within in single stress fiber largely determines the stress a single bond experiences (Koenderink et al., 2009), with substrate stiffness affecting maximum force loading rate. The biphasic nature of catch bond lifetime allows cancer cells to become more migratory and less durotactic with increased contractility, which likely contributes to the greater metastatic potential as well as sets population stability as observed experimentally (Beri et al., 2020). That being said, while our data suggest a cytoskeletonally driven mechanism, it does not rule out confounding issues from adhesion location, composition, or dynamics.

While material properties change between tumors (Ahn et al., 2010; Burgstaller et al., 2017; Cox and Epler, 2011; Krupski et al., 2010; Pankova et al., 2019; Paszek et al., 2005; White, 2015; Zhai et al., 2010) and can be affected by cancer treatment (Miller et al., 2018), we found that durotactic behavior and migration speed can be tuned by actomyosin contractility, without any direct tweaks to protein expression levels. This suggests that the differences in migratory behavior are indeed linked directly to cell mechanotype within its niche. This may also explain why drugs that specifically target proteins involved

contain cells that encompass a range of actomyosin activities. Additionally, the ECM surrounding tumors show dynamic, non-linear properties, which are known to influence the outcome of tumor progression and metastasis (Chaudhuri et al., 2020; Malandrino et al., 2019; Münster et al., 2013). These heterogeneities and tumor plasticity could present some key challenges to drug development. While our current *in vitro* and *in silico* models do not focus on these parameters, our results suggest that future metastatic modeling should couple adhesion dynamics, stress fiber considerations, and heterogeneity in cellular and ECM mechanics when identifying the lowest effective dose required to prevent metastasis.

## INCLUSION AND DIVERSITY

One or more of the authors of this paper self-identifies as an under-represented ethnic minority in science and received support from a program designed to increase minority representation in science. The author list of this paper includes contributors from the location where the research was conducted who participated in the data collection, design, analysis, and/or interpretation of the work.

## STAR★METHODS

Detailed methods are provided in the online version of this paper and include the following:

- KEY RESOURCES TABLE
- RESOURCE AVAILABILITY
  - Lead contact
  - Materials availability
  - Data and code availability
- EXPERIMENTAL MODEL AND SUBJECT DETAILS
  - Cell culture
- METHOD DETAILS
  - Fabrication of step-gradient polyacrylamide gels
  - Isolating weakly and strongly adherent cells
  - Population-based adhesion assay
  - 2D migration assays
  - Traction force microscopy
  - Computational modeling
  - Immunofluorescence staining and FA analysis
  - Cytokine antibody array
- QUANTIFICATION AND STATISTICAL ANALYSIS

## SUPPLEMENTAL INFORMATION

Supplemental Information can be found online at <https://doi.org/10.1016/j.celrep.2021.108816>.

## ACKNOWLEDGMENTS

The authors thank Dr. Jing Yang or helpful discussions and the UCSD Campus Research Machine Shop for assistance in device fabrication. A.J.E. acknowledges grant support from the National Institutes of Health (R01CA206880 and R21CA217735) and National Science Foundation (1763139). P.K. acknowledges grant support from the National Science Foundation (1763132) and the Army Research Office (W911NF-17-1-0413). P.B. was supported by the National Science Foundation GRFP.

## AUTHOR CONTRIBUTIONS

B.Y., P.K., and A.J.E. conceived of the project and designed the experiments. B.Y., G.S., and P.B. performed all cell assays. All computational modeling was performed by B.Y. Spinning disk assays and analyses were performed by A.B. The manuscript was written by B.Y., P.K., and A.J.E. with input from the other authors.

## DECLARATION OF INTERESTS

The authors declare no competing interests.

Received: August 12, 2020  
Revised: January 10, 2021  
Accepted: February 10, 2021  
Published: March 9, 2021

## SUPPORTING CITATIONS

The following references appear in the Supplemental Information: Bidone et al. (2019); Blystone (2004); Bosgraaf and Van Haastert (2009b, 2009a); Brizendine et al. (2015); Cooper (2000); Cooper and Hausman (2007); Elosegui-Artola et al. (2014); Himmel et al. (2009); Molloy et al. (1995); Pollard (1986); Pompe et al. (2011); Prahli et al. (2020); Tapia-Rojo et al. (2020); Vavylonis et al. (2005); Vicente-Manzanares et al. (2009).

## REFERENCES

- Ahn, B.-M., Kim, J., Ian, L., Rha, K.-H., and Kim, H.-J. (2010). Mechanical property characterization of prostate cancer using a minimally motorized indenter in an ex vivo indentation experiment. *Urology* 76, 1007–1011.
- Bangasser, B.L., and Odde, D.J. (2013). Master equation-based analysis of a motor-clutch model for cell traction force. *Cell. Mol. Bioeng.* 6, 449–459.
- Beri, P., Popravko, A., Yeoman, B., Kumar, A., Chen, K., Hodzic, E., Chiang, A., Banisadr, A., Placone, J.K., Carter, H., et al. (2020). Cell adhesiveness serves as a biophysical marker for metastatic potential | *Cancer Research*. *Cancer Res.* 80, 901–911.
- Bidone, T.C., Skeeters, A.V., Oakes, P.W., and Voth, G.A. (2019). Multiscale model of integrin adhesion assembly. *PLoS Comput. Biol.* 15, e1007077.
- Blystone, S.D. (2004). Integrating an integrin: a direct route to actin. *Biochimica et Biophysica Acta (BBA) - Molecular Cell Research* 1692, 47–54.
- Boettiger, D. (2007). Quantitative Measurements of Integrin-Mediated Adhesion to Extracellular Matrix. *Methods Enzymol.* 426, 1–25.
- Bosgraaf, L., and Van Haastert, P.J.M. (2009a). The ordered extension of pseudopodia by amoeboid cells in the absence of external cues. *PLoS ONE* 4, e5253.
- Bosgraaf, L., and Van Haastert, P.J.M. (2009b). Navigation of chemotactic cells by parallel signaling to pseudopod persistence and orientation. *PLoS ONE* 4, e6842.
- Brizendine, R.K., Alcalá, D.B., Carter, M.S., Haldeman, B.D., Facemyer, K.C., Baker, J.E., and Cremo, C.R. (2015). Velocities of unloaded muscle filaments are not limited by drag forces imposed by myosin cross-bridges. *Proc. Natl. Acad. Sci. USA* 112, 11235–11240.
- Burgstaller, G., Oehrlé, B., Gerckens, M., White, E.S., Schiller, H.B., and Eickelberg, O. (2017). The instructive extracellular matrix of the lung: basic composition and alterations in chronic lung disease. *Eur. Respir. J.* 50, 1601805.
- Burrige, K., and Guilly, C. (2016). Focal adhesions, stress fibers and mechanical tension. *Exp. Cell Res.* 343, 14–20.
- Chaudhuri, O., Cooper-White, J., Janmey, P.A., Mooney, D.J., and Shenoy, V.B. (2020). Effects of extracellular matrix viscoelasticity on cellular behaviour. *Nature* 584, 535–546.
- Cooper, G.M. (2000). *The Cell: A Molecular Approach*, Second Edition (Sinauer).
- Cooper, G.M., and Hausman, R.E. (2007). *The Cell: A Molecular Approach* (ASM Press).
- Cox, T.R., and Erler, J.T. (2011). Remodeling and homeostasis of the extracellular matrix: implications for fibrotic diseases and cancer. *Dis. Model. Mech.* 4, 165–178.
- Danuser, G., Allard, J., and Mogilner, A. (2013). Mathematical modeling of eukaryotic cell migration: insights beyond experiments. *Annu. Rev. Cell Dev. Biol.* 29, 501–528.
- DuChez, B.J., Doyle, A.D., Dimitriadis, E.K., and Yamada, K.M. (2019). Durotaxis by Human Cancer Cells. *Biophys. J.* 116, 670–683.
- Elosegui-Artola, A., Jorge-Peñas, A., Moreno-Arotzena, O., Oregi, A., Lasa, M., García-Aznar, J.M., De Juan-Pardo, E.M., and Aldabe, R. (2014). Image analysis for the quantitative comparison of stress fibers and focal adhesions. *PLoS ONE* 9, e107393.
- Feng, J., Levine, H., Mao, X., and Sander, L.M. (2019). Cell motility, contact guidance, and durotaxis. *Soft Matter* 15, 4856–4864.
- Fusco, S., Panzetta, V., and Netti, P.A. (2017). Mechanosensing of substrate stiffness regulates focal adhesions dynamics in cell. *Meccanica* 52, 3389–3398.
- Goley, E.D., and Welch, M.D. (2006). The ARP2/3 complex: an actin nucleator comes of age. *Nat. Rev. Mol. Cell Biol.* 7, 713–726.
- Grashoff, C., Hoffman, B.D., Brenner, M.D., Zhou, R., Parsons, M., Yang, M.T., McLean, M.A., Sligar, S.G., Chen, C.S., Ha, T., and Schwartz, M.A. (2010). Measuring mechanical tension across vinculin reveals regulation of focal adhesion dynamics. *Nature* 466, 263–266.
- Hansen, M.D.H., and Kwiatkowski, A.V. (2013). Chapter One - Control of Actin Dynamics by Allosteric Regulation of Actin Binding Proteins. In *International*



- Review of Cell and Molecular Biology, K.W. Jeon, ed. (Academic Press), pp. 1–25.
- Happe, C.L., Tenerelli, K.P., Gromova, A.K., Kolb, F., and Engler, A.J. (2017). Mechanically patterned neuromuscular junctions-in-a-dish have improved functional maturation. *Mol. Biol. Cell* **28**, 1950–1958.
- Heyes, D.M. (2019). Translational and rotational diffusion of rod shaped molecules by molecular dynamics simulations. *J. Chem. Phys.* **150**, 184503.
- Himmel, M., Ritter, A., Rothmund, S., Pauling, B.V., Rottner, K., Gingras, A.R., and Ziegler, W.H. (2009). Control of high affinity interactions in the talin C terminus: how talin domains coordinate protein dynamics in cell adhesions. *J. Biol. Chem.* **284**, 13832–13842.
- Holmes, W.R., and Edelstein-Keshet, L. (2012). A comparison of computational models for eukaryotic cell shape and motility. *PLoS Comput. Biol.* **8**, e1002793.
- Howard, J. (2001). *Mechanics of Motor Proteins and the Cytoskeleton* (Sinauer Associates, Publishers).
- Isomursu, A., Park, K.-Y., Hou, J., Cheng, B., Shamsan, G., Fuller, B., Kasim, J., Mahmoodi, M.M., Lu, T.J., Genin, G.M., et al. (2020). Negative durotaxis: cell movement toward softer environments. *BioRxiv*, 2020.10.27.357178.
- Joaquin, D., Grigola, M., Kwon, G., Blasius, C., Han, Y., Perlitz, D., Jiang, J., Ziegler, Y., Nardulli, A., and Hsia, K.J. (2016). Cell migration and organization in three-dimensional in vitro culture driven by stiffness gradient. *Biotechnol. Bioeng.* **113**, 2496–2506.
- Kim, M.-C., Silberberg, Y.R., Abeyaratne, R., Kamm, R.D., and Asada, H.H. (2018). Computational modeling of three-dimensional ECM-rigidity sensing to guide directed cell migration. *Proc. Natl. Acad. Sci. USA* **115**, E390–E399.
- Koenderink, G.H., Dogic, Z., Nakamura, F., Bendix, P.M., MacKintosh, F.C., Hartwig, J.H., Stossel, T.P., and Weitz, D.A. (2009). An active biopolymer network controlled by molecular motors. *Proc. Natl. Acad. Sci. USA* **106**, 15192–15197.
- Kong, F., Garcia, A.J., Mould, A.P., Humphries, M.J., and Zhu, C. (2009). Demonstration of catch bonds between an integrin and its ligand. *J. Cell Biol.* **185**, 1275–1284.
- Krupski, T.L., Gundersen, C., Carson, W.C., Moskaluk, C., Harper, J., and Gerling, G.J. (2010). Assessing mechanical properties of benign and malignant prostate tissue. *J. Clin. Oncol.* **28**, e15109, e15109.
- Lachowski, D., Cortes, E., Pink, D., Chronopoulos, A., Karim, S.A., P Morton, J., and Del Rio Hernández, A.E. (2017). Substrate Rigidity Controls Activation and Durotaxis in Pancreatic Stellate Cells. *Sci. Rep.* **7**, 2506.
- Lara Rodriguez, L., and Schneider, I.C. (2013). Directed cell migration in multicellular environments. *Integr. Biol.* **5**, 1306–1323.
- Legate, K.R., Montañez, E., Kudlacek, O., and Fässler, R. (2006). ILK, PINCH and parvin: the tIPP of integrin signalling. *Nat. Rev. Mol. Cell Biol.* **7**, 20–31.
- Lo, C.M., Wang, H.B., Dembo, M., and Wang, Y.L. (2000). Cell movement is guided by the rigidity of the substrate. *Biophys. J.* **79**, 144–152.
- Lo Sardo, V., Chubukov, P., Ferguson, W., Kumar, A., Teng, E.L., Duran, M., Zhang, L., Cost, G., Engler, A.J., Urnov, F., et al. (2018). Unveiling the Role of the Most Impactful Cardiovascular Risk Locus through Haplotype Editing. *Cell* **175**, 1796–1810.e20.
- Mak, M., Kim, T., Zaman, M.H., and Kamm, R.D. (2015). Multiscale mechanobiology: computational models for integrating molecules to multicellular systems. *Integr. Biol.* **7**, 1093–1108.
- Mak, M., Anderson, S., McDonough, M.C., Spill, F., Kim, J.E., Boussommier-Calleja, A., Zaman, M.H., and Kamm, R.D. (2017). Integrated Analysis of Intracellular Dynamics of Mena<sup>IV</sup> Cancer Cells in a 3D Matrix. *Biophys. J.* **112**, 1874–1884.
- Malandrino, A., Trepap, X., Kamm, R.D., and Mak, M. (2019). Dynamic filopodial forces induce accumulation, damage, and plastic remodeling of 3D extracellular matrices. *PLoS Comput. Biol.* **15**, e1006684.
- McKenzie, A.J., Hicks, S.R., Svec, K.V., Naughton, H., Edmunds, Z.L., and Howe, A.K. (2018). The mechanical microenvironment regulates ovarian cancer cell morphology, migration, and spheroid disaggregation. *Sci. Rep.* **8**, 7228.
- Miller, J.P., Borde, B.H., Bordeleau, F., Zanotelli, M.R., LaValley, D.J., Parker, D.J., Bonassar, L.J., Pannullo, S.C., and Reinhart-King, C.A. (2018). Clinical doses of radiation reduce collagen matrix stiffness. *APL Bioeng.* **2**, 031901.
- Molloy, J.E., Burns, J.E., Kendrick-Jones, J., Tregear, R.T., and White, D.C.S. (1995). Movement and force produced by a single myosin head. *Nature* **378**, 209–212.
- Morikis, V.A., Chase, S., Wun, T., Chaikof, E.L., Magnani, J.L., and Simon, S.I. (2017). Selectin catch-bonds mechanotransduce integrin activation and neutrophil arrest on inflamed endothelium under shear flow. *Blood* **130**, 2101–2110.
- Münster, S., Jawerth, L.M., Leslie, B.A., Weitz, J.I., Fabry, B., and Weitz, D.A. (2013). Strain history dependence of the nonlinear stress response of fibrin and collagen networks. *Proc. Natl. Acad. Sci. USA* **110**, 12197–12202.
- Novikova, E.A., Raab, M., Discher, D.E., and Storm, C. (2017). Persistence-driven durotaxis: Generic, directed motility in rigidity gradients. *Phys. Rev. Lett.* **118**, 078103.
- Pankova, D., Jiang, Y., Chatzifrangkeskou, M., Vendrell, I., Buzzelli, J., Ryan, A., Brown, C., and O’Neill, E. (2019). RASSF1A controls tissue stiffness and cancer stem-like cells in lung adenocarcinoma. *EMBO J.* **38**, e100532.
- Paszek, M.J., Zahir, N., Johnson, K.R., Lakins, J.N., Rozenberg, G.I., Gefen, A., Reinhart-King, C.A., Margulies, S.S., Dembo, M., Boettiger, D., et al. (2005). Tensional homeostasis and the malignant phenotype. *Cancer Cell* **8**, 241–254.
- Pollard, T.D. (1986). Rate constants for the reactions of ATP- and ADP-actin with the ends of actin filaments. *J. Cell Biol.* **103**, 2747–2754.
- Pompe, T., Kaufmann, M., Kasimir, M., Johne, S., Glorius, S., Renner, L., Bobeth, M., Pompe, W., and Werner, C. (2011). Friction-controlled traction force in cell adhesion. *Biophys. J.* **101**, 1863–1870.
- Prahl, L.S., Stanslaski, M.R., Vargas, P., Piel, M., and Odde, D.J. (2020). Predicting Confined 1D Cell Migration from Parameters Calibrated to a 2D Motor-Clutch Model. *Biophys. J.* **118**, 1709–1720.
- Rio, A., Perez-Jimenez, R., Liu, R., Roca-Cusachs, P., Fernandez, J.M., and Sheetz, M.P. (2009). Stretching single talin rod molecules activates vinculin binding. *Science* **323**, 638–641.
- Sawada, Y., Tamada, M., Dubin-Thaler, B.J., Cherniavskaya, O., Sakai, R., Tanaka, S., and Sheetz, M.P. (2006). Force sensing by mechanical extension of the Src family kinase substrate p130Cas. *Cell* **127**, 1015–1026.
- Schaller, M.D. (2001). Paxillin: a focal adhesion-associated adaptor protein. *Oncogene* **20**, 6459–6472.
- Schlüter, D.K., Ramis-Conde, I., and Chaplain, M.A.J. (2012). Computational modeling of single-cell migration: the leading role of extracellular matrix fibers. *Biophys. J.* **103**, 1141–1151.
- Schneider, Caroline, Rasband, Wayne, and Eliceiri, Kevin (2012). NIH Image to ImageJ: 25 years of image analysis. *Nature Methods* **9**, 671–675.
- Schwarz, U.S., Erdmann, T., and Bischofs, I.B. (2006). Focal adhesions as mechanosensors: the two-spring model. *Biosystems* **83**, 225–232.
- Shatkin, G., Yeoman, B., Birmingham, K., Katira, P., and Engler, A.J. (2020). Computational models of migration modes improve our understanding of metastasis. *APL Bioeng.* **4**, 041505.
- Singh, S.P., Schwartz, M.P., Lee, J.Y., Fairbanks, B.D., and Anseth, K.S. (2014). A peptide functionalized poly(ethylene glycol) (PEG) hydrogel for investigating the influence of biochemical and biophysical matrix properties on tumor cell migration. *Biomater. Sci.* **2**, 1024–1034.
- Stefanoni, F., Ventre, M., Mollica, F., and Netti, P.A. (2011). A numerical model for durotaxis. *J. Theor. Biol.* **280**, 150–158.
- Sunyer, R., Conte, V., Escribano, J., Elosegui-Artola, A., Labernadie, A., Valon, L., Navajas, D., García-Aznar, J.M., Muñoz, J.J., Roca-Cusachs, P., and Trepap, X. (2016). Collective cell durotaxis emerges from long-range intercellular force transmission. *Science* **353**, 1157–1161.
- Tan, S.J., Chang, A.C., Anderson, S.M., Miller, C.M., Prahl, L.S., Odde, D.J., and Dunn, A.R. (2020). Regulation and dynamics of force transmission at individual cell-matrix adhesion bonds. *Sci. Adv.* **6**, eaax0317.

Tapia-Rojo, R., Alonso-Caballero, A., and Fernandez, J.M. (2020). Direct observation of a coil-to-helix contraction triggered by vinculin binding to talin. *Sci. Adv.* 6, eaaz4707.

Vavylonis, D., Yang, Q., and O'Shaughnessy, B. (2005). Actin polymerization kinetics, cap structure, and fluctuations. *Proc. Natl. Acad. Sci. USA* 102, 8543–8548.

Vicente-Manzanares, M., Choi, C.K., and Horwitz, A.R. (2009). Integrins in cell migration—the actin connection. *J. Cell Sci.* 122, 199–206.

White, E.S. (2015). Lung extracellular matrix and fibroblast function. *Ann. Am. Thorac. Soc.* 12 (Suppl 1), S30–S33.

Wu, C. (2005). PINCH, N(i)ck and the ILK: network wiring at cell-matrix adhesions. *Trends Cell Biol.* 15, 460–466.

Wu, C., and Dedhar, S. (2001). Integrin-linked kinase (ILK) and its interactors: a new paradigm for the coupling of extracellular matrix to actin cytoskeleton and signaling complexes. *J. Cell Biol.* 155, 505–510.

Yeoman, B.M., and Katira, P. (2018). A stochastic algorithm for accurately predicting path persistence of cells migrating in 3D matrix environments. *PLoS ONE* 13, e0207216.

Zhai, L., Madden, J., Foo, W.-C., Mouraviev, V., Polascik, T.J., Palmeri, M.L., and Nightingale, K.R. (2010). Characterizing stiffness of human prostates using acoustic radiation force. *Ultrason. Imaging* 32, 201–213.

Zhu, C., and Chen, W. (2013). Catch Bonds of Integrin/Ligand Interactions. In *Single-Molecule Studies of Proteins*, A.F. Oberhauser, ed. (Springer), pp. 77–96.

## STAR★METHODS

### KEY RESOURCES TABLE

| REAGENT OR RESOURCE                                         | SOURCE                   | IDENTIFIER                                                                                                |
|-------------------------------------------------------------|--------------------------|-----------------------------------------------------------------------------------------------------------|
| <b>Antibodies</b>                                           |                          |                                                                                                           |
| Rabbit monoclonal Anti-Paxillin                             | Abcam                    | Cat#ab32084; RRID: AB_779033                                                                              |
| Goat polyclonal anti-Rabbit                                 | ThermoFisher Scientific  | Cat#A-11008; RRID: AB_143165                                                                              |
| <b>Chemicals, peptides, and recombinant proteins</b>        |                          |                                                                                                           |
| (S)4'nitroBlebbistatin                                      | Cayman Chemical Co.      | Cat#24171; CAS: 1621326-32-6                                                                              |
| Oleoyl-L- $\alpha$ -lysophosphatidic acid sodium salt       | Sigma Aldrich            | Cat#L7260; CAS: 22556-62-3                                                                                |
| Rhodamine Phalloidin                                        | ThermoFisher Scientific  | Cat#R415; CAS: 219920-04-4                                                                                |
| Hoechst 33342                                               | Invitrogen               | Cat#H3570; CAS: 23491-52-3                                                                                |
| Sulfosuccinimidyl 6-(4'-azido-2'-nitrophenylamino)hexanoate | CovaChem                 | Cat#13414-5x5; CAS: 102568-43-4                                                                           |
| 2-hydroxy-4'-(2-hydroxyethoxy)-2-methylpropiofenone         | Sigma Aldrich            | Cat#410896-10G; CAS: 106797-53-9                                                                          |
| <b>Deposited data</b>                                       |                          |                                                                                                           |
| Raw and analyzed data                                       | This paper               | N/A                                                                                                       |
| <b>Experimental models: cell lines</b>                      |                          |                                                                                                           |
| Human: MDA-MB-231 metastatic breast cancer cell line        | ATCC                     | ATCC HTB-26                                                                                               |
| Human: PC-3 metastatic prostate cancer cell line            | ATCC                     | ATCC CRL-1435                                                                                             |
| Human: NCI-H1299 metastatic lung cancer cell line           | ATCC                     | ATCC CRL-5803                                                                                             |
| <b>Software and algorithms</b>                              |                          |                                                                                                           |
| Cell Tracking Script                                        | MATLAB, This paper       | <a href="https://github.com/compactmatterlab/Durotaxis">https://github.com/compactmatterlab/Durotaxis</a> |
| Computational Cell Migration Model                          | MATLAB, This paper       | <a href="https://github.com/compactmatterlab/Durotaxis">https://github.com/compactmatterlab/Durotaxis</a> |
| Cell Adhesion Script                                        | MATLAB, This paper       | <a href="https://github.com/englea52/EnglerLab">https://github.com/englea52/EnglerLab</a>                 |
| ImageJ                                                      | (Schneider et al., 2012) | <a href="https://imagej.nih.gov/ij/">https://imagej.nih.gov/ij/</a>                                       |
| Particle image velocimetry script                           | Lo Sardo et al., 2018    | N/A                                                                                                       |
| <b>Other</b>                                                |                          |                                                                                                           |
| Step-gradient polyacrylamide gels                           | Happe et al., 2017       | N/A                                                                                                       |
| Parallel plate flow chamber                                 | Beri et al., 2020        | N/A                                                                                                       |
| Spinning Disc Assay                                         | Boettiger, 2007          | N/A                                                                                                       |
| Proteome Profiler Human XL Cytokine Array                   | R&D Systems              | Cat# ARY022B                                                                                              |

### RESOURCE AVAILABILITY

#### Lead contact

Further information and requests for resources and reagents should be directed to and will be fulfilled by the Lead Contact, Adam Engler ([aengler@ucsd.edu](mailto:aengler@ucsd.edu)).

#### Materials availability

Photopatterned polyacrylamide gels generated in this study will be made available on request.

### Data and code availability

The MATLAB code used to track cell migration for brightfield images, analyze focal adhesion immunofluorescence images, simulate cell migration, and test the model is available via Github (<https://github.com/compactmatterlab/Durotaxis>). The MATLAB code for adhesion analysis is also available via Github (<https://github.com/englea52/Englerlab>).

## EXPERIMENTAL MODEL AND SUBJECT DETAILS

### Cell culture

Human metastatic cell lines used in this study include MDA-MB-231 (mammary, female 51 years), PC-3 (prostate, male 62 years), and NCI-H1299 (lung, male 43 years). MDA-MB-231 cells were cultured in DMEM, 10% FBS, and 1% antibiotic/antimycotic; PC-3 cells were cultured in F-12K, 10% FBS, and 1% penicillin/streptomycin; NCI-H1299 cells cultured in RPMI 1640, 10% FBS, and 1% antibiotic/antimycotic. All cells were purchased from ATCC and authenticated by morphology, growth curve, and isoenzyme analysis. PCR was used to verify cultures were free of *Mycoplasma*, and cells were not used beyond passage 11. Media reagents were purchased from Life Technologies.

## METHOD DETAILS

### Fabrication of step-gradient polyacrylamide gels

We used a two-step photopolymerization method described previously (Happe et al., 2017) to produce hydrogels with alternating elasticity profiles. Acrylamide concentrations of the prepolymer solutions were modified to obtain elasticities matching that of the tumor and stromal environment of each type of cancer. For breast cancer hydrogels, 3% acrylamide (3.7% for lung, 6.4% for prostate) and 0.4% bis-acrylamide were used for the first prepolymer solution, which was polymerized between a methacrylated 18mm coverslip and a chlorosilanated glass slide by exposing to ultraviolet light (350 nm) for 5 minutes, using 2-hydroxy-4'-(2-hydroxyethoxy)-2-methylpropiophenone (0.5%) as the photo-initiator. The PA hydrogel was removed from the chlorosilanated glass slide and dehydrated for 1 hour on a hot plate at 30 C prior to rehydrating with a 2% acrylamide (3.7% for lung, 3.2% for prostate) and 0.4% bis-acrylamide prepolymer solution. The rehydrated gel was again exposed to UV light for 5 min through a high-resolution chrome patterned photomask 200  $\mu\text{m}$  dark stripes and 100  $\mu\text{m}$  clear stripes. The Young's moduli of each region were validated using atomic force microscopy.

The hydrogels were then placed in a 12-well plate on top of 50  $\mu\text{l}$  of 2 mg/ml of collagen I to adhere the coverslip to the bottom of the well. After the collagen polymerized, the gels were immersed in a solution of sulfosuccinimidyl 6-(4'-azido-2'-nitrophenylamino)hexanoate (0.2 mg/ml, Sulfo-SANPAH; Pierce) dissolved in 4-(2-hydroxyethyl)-1-piperazineethanesulfonic acid buffer (pH 8.4, 50 mM) and exposed to UV light (350 nm) for 10 minutes. After washing several times with PBS, the functionalized surface of the gels was coated with collagen I (150  $\mu\text{g/ml}$ ) by incubating overnight at 37 C.

### Isolating weakly and strongly adherent cells

Weakly and strongly adherent cells were isolated at varying shear stresses using a parallel plate flow chamber (Beri et al., 2020). To ensure sufficient spacing between individual cells, MDA-MB-231 and NCI-H1299 cells were seeded at  $\sim 1800$  cells/ $\text{cm}^2$  onto a fibronectin (2  $\mu\text{g/cm}^2$ ) coated glass plate and incubated overnight. PC-3 cells were found to detach more consistently on a collagen I (1  $\mu\text{g/cm}^2$ ) coated glass plate and seeded lower at 1500 cells/ $\text{cm}^2$ . For each cell line, PBS free of magnesium and calcium and with 4.5 g/L of dextrose was used to shear cells. Shear stresses used to detach the weakly adherent (WA) population were selected to collect about 20,000 cells at a given flow rate (3 min at 30 dynes/ $\text{cm}^2$  for MDA-MB-231, 3 min at 60 dynes/ $\text{cm}^2$  for PC-3 and NCI-H1299 cells). The strongly adherent (SA) population was collected after washing away the intermediate population at a higher shear stress (2 min 500 at dynes/ $\text{cm}^2$  for MDA-MB-231, 5 min at 300 dynes/ $\text{cm}^2$  for NCI-H1299, and 2 min at 750 dynes/ $\text{cm}^2$  for PC-3), and detaching the remaining SA population using 0.25% trypsin-EDTA. Media was then pumped through the device to neutralize the trypsin and collect the SA cells. Collected cells were then seeded onto hydrogels and allowed to adhere for at least 2 hours prior to imaging.

### Population-based adhesion assay

Cells were seeded onto 0.35 and 1.8 kPa hydrogels attached to 25 mm glass coverslips that were functionalized with 10  $\mu\text{g/mL}$  human fibronectin. Cells were seeded at a density  $\sim 1,800$  cells/ $\text{cm}^2$  to minimize cell-cell contact. Cells attached to coverslips for a minimum of 12 hr using appropriate cell culture media at which time they were then mounted on a custom-built spinning-disk device (Boettiger, 2007), submerged into temperature-controlled PBS free of magnesium and calcium and with 4.5 g/L of dextrose, and exposed to a range of fluid shear—depending on rotational speed—for 5 min. Once spun, cells were then fixed with 3.7% formaldehyde. Cell nuclei were then stained with 4',6-Diamidino-2-Phenylindole (DAPI, 1:2500) and imaged using a CSU-X1 confocal scanner unit (Yokogawa), QuantEM:512SC camera (Photometrics), and MS-2000-WK multi-axis stage controller (Applied Scientific Instrumentation) on a Nikon Ti-S microscope. Metamorph 7.6 software and a custom-written MATLAB script (<https://github.com/englea52/EnglerLab>, MathWorks, Natick, MA) was used to stitched together 1500 individual images of nuclei and quantify average cell adhesion, i.e.,  $\tau_{50}$ , which is defined as the shear stress at which 50% of the initial cell population is removed by shear stress. Shear stress was calculated based on Equation 1:

$$\tau = \frac{4}{5}r\sqrt{\rho\mu\omega^3} \quad (\text{Equation 1})$$

where  $r$  is the radial position from the center of the disk,  $\rho$  is the buffer density,  $\mu$  is the buffer viscosity, and  $\omega$  is the rotational velocity.

## 2D migration assays

Isolated cells were seeded at ~1500 cells/well onto step-gradient gels fixed in a 12-well plate and allowed to adhere for no more than 2 hours to ensure a random distribution across the step-gradient at the start of imaging. The cells were imaged over 24 hours using a Nikon Eclipse Ti-S microscope equipped with a temperature and CO<sub>2</sub> controller (Pathology Devices Inc., LiveCell). Images at multiple cell positions were taken in brightfield at 10x every 15 minutes. Cell trajectories were collected and analyzed using a custom MATLAB script (<https://github.com/compactmatterlab/Durotaxis>, MathWorks, Natick, MA). To prevent biases due to differences in cell division on soft or stiff substrates, daughter cells were excluded in trajectory analysis. From cell trajectories, we categorized cell migration as durotactic, anti-durotactic, or adurotactic, meaning that cells migrated across the substrate stiffness boundary only from soft to stiff, only from stiff to soft, or crossed the boundary multiple times, respectively; cells never approaching the boundary were not categorized. Trajectories were used to determine the distance between each cell and its closest soft-stiff boundary and plot the distribution of cells across the boundary. For cell migrating under drug treatment, cells were treated with either DMSO, 1 μM, 10 μM, or 100 μM (S)4' nitroBlebbistatin (24171, Cayman Chemical Co.) or lysophosphatidic acid and imaged 3 hours after treatment for up to 24 hours.

## Traction force microscopy

Traction forces were measured as previously described and calculated using a custom MATLAB script (Lo Sardo et al., 2018). Cells were seeded on to single-modulus polyacrylamide hydrogels with an elasticity matching their respective tumor microenvironment. Prepolymer solutions contained 2% (v/v) of 0.2 μm diameter 580/605 FluoSpheres microspheres (Invitrogen). Gels were prepared as we previously described (Beri et al., 2020) in 24-well glass bottom plates (Cellvis). Cell were seeded at ~5,000 cells per well and allowed to adhere for at least 3 hours. Brightfield images were taken at 60x to obtain cell areas as measured in ImageJ. Bead images were then captured every minute for 30 minutes. Reference images were then taken after removing the cells with 10% (v/v) Triton X solution. Traction forces were determined from the traction stress map and normalized to cell area.

## Computational modeling

To understand how durotaxis and adurotaxis can occur due to differences in cell contractility and adhesion dynamics, we built a computational model that incorporates focal adhesion formation, stress fiber (SF) mediated force generation, and catch or slip bond dynamics between the cell receptors and surface adhesion sites. This model is described in detail below –

- 1) A cell is defined by a central point. A random number of stress fibers, obtained from a Poisson distribution with mean  $\mu_{SF}$ , are generated about the central point. Each stress fiber has an initial length equal to the radius of the cell (5 μm) and is oriented radially. The angular distribution of these stress fiber is uniform from 0 to  $2\pi$  radian.
- 2) These stress fibers can then grow in length radially based on the rate of actin polymerization ( $v_{act,L}$  if along the leading edge, defined by a region within  $-\pi/2$  and  $\pi/2$  radians of the cell migration direction, or  $v_{act,T}$  if in the direction of the trailing edge, a region complimentary to the leading edge) or shrink in length based on the rate of depolymerization ( $v_{ret}$ ). (Initial cell migration direction is picked randomly, though this changes as described in part 7). The stress fibers switch from polymerization to depolymerization sporadically at time intervals generated from an exponential random number based on an average retraction time ( $t_{ret}$ ), while depolymerization stops when the stress fiber reaches a minimum length (assumed to be the cell radius). The polymerizing and depolymerizing stress fibers are free to diffuse angularly about the cell center, with a diffusion coefficient dependent on the length of the SF (Heyes, 2019), Equation 2.

$$D_{rot} = \frac{3k_B T \ln\left(\frac{L}{d_{act}}\right)}{\pi\eta L^3} \quad (\text{Equation 2})$$

Here  $k_B$  is Boltzmann's constant,  $T$  is temperature,  $L$  is the length of the actin filament,  $d_{act}$  is the diameter of an F-actin, and  $\eta$  is the viscosity of the cytoplasm.

- 3) Both polymerizing and depolymerizing SFs can bind to the substrate at their free end and begin to form a focal adhesion via integrin-substrate bonds. This arrests the growth, shrinking and diffusion of the SF. The newly formed ECM-integrin-SF complex may be comprised of solely an adaptor protein (i.e., paxillin (Schaller, 2001), zyxin (Hansen and Kwiatkowski, 2013), etc. (Legate et al., 2006; Wu, 2005; Wu and Dedhar, 2001)), an adaptor protein with a stress sensor protein (i.e., vinculin (Grashoff et al., 2010; Rio et al., 2009), talin (Burrige and Guilly, 2016; Rio et al., 2009)), or branched (i.e., Apr2/3 (Goley and Welch, 2006)) with some combination of adaptor and tension sensor proteins. The dynamics of these protein interactions are modeled

by first determining the SF-integrin-ECM binding probability, calculated by Equation 3,

$$P_{on} = 1 - e^{-\Delta t k_{on}} \quad (\text{Equation 3})$$

where  $\Delta t$  is the model's timestep and  $k_{on}$  is the assembly rate of the SF-integrin-ECM complex. The number of integrins bound to the SF is determined stochastically using the Poisson distribution with an average given by the average number of integrins/F-actin ( $\mu_{int}$ ). We assume stress fibers with more than one integrin have a branching protein already bound to the SF prior to assembly of the complex. Likewise, each integrin has a certain probability ( $P_{tal}$ ) of being bound to a stress sensor protein prior to complex assembly.

- 4) Integrin-ECM bonds have a certain probability of unbinding based on the applied load on each bond via the SF and the catch or slip bond dynamics measured experimentally by Kong et al. (Kong et al., 2009) and calculated by Equation 4,

$$P_{off} = 1 - e^{-\Delta t k_{off}(f)} \quad (\text{Equation 4a})$$

$$k_{off}(f) = \left[ A e^{-f\xi/k_B T} + \left( B e^{f\xi/k_B T} + C e^{-f\xi/k_B T} \right)^{-1} \right]^{-1} \text{ for catch} \quad (\text{Equation 4b})$$

$$k_{off}(f) = K_0 e^{f/F_b} \text{ for slip} \quad (\text{Equation 4c})$$

where  $A$ ,  $B$ , and  $C$  are constants,  $\xi$  is the unbinding length, and  $f$  is the load on an individual bond. For slip bonds,  $K_0$  is the unloaded off rate and  $F_b$  is the characteristic bond rupture force (Bangasser and Odde, 2013). When a single SF is bound to multiple integrin-ECM bonds, the SF forces is distributed equally across each of these bonds.

- 5) The SF force increases exponentially with time based on Equation 5, as derived in (Schwarz et al., 2006)

$$F = F_S \left( 1 - e^{-v_0 K_{ecm} t / F_S} \right) \quad (\text{Equation 5})$$

where  $F_S$  is the max SF force, determined by the myosin motor force ( $F_{myo}$ ) times the number of myosin motors ( $n_{myo}$ ).  $v_0$  is the myosin sliding velocity and  $K_{ecm}$  is the underlying ECM stiffness. The model is based on the linear force velocity relationship of molecular motors such as non-muscle myosin II, (Howard, 2001) and a simple two-spring model. The stiffness of the ECM is converted from the user defined Young's modulus ( $E_{stiff}$ ,  $E_{soft}$ ) by multiplying the modulus with a characteristic length (set to 0.1  $\mu\text{m}$ ) based on the order of magnitude for molecular sensing of myosin and related motor protein structures, e.g., thin filaments. The ECM stiffness value is spatially varied to simulate the photopatterned PA gels with a gradient length ( $L_{grad}$ ) of 10  $\mu\text{m}$  between the soft and stiff regions, as determined from AFM measurements. The stiffness of the protein complexes involved in the ECM bond is neglected as they are an order of magnitude stiffer than the underlying substrate.

- 6) If a tension sensor protein experiences a sufficiently large force  $f > F_{thres}$  it opens actin binding sites for recruiting new SFs (Grashoff et al., 2010; Rio et al., 2009), leading to FA growth and maturation. A new SFs (not one of the existing SFs) will bind to this open site with a given probability determined by Equation 6,

$$P_{Act} = 1 - e^{-t_{SF} K_{Act}} \quad (\text{Equation 6})$$

where  $t_{SF}$  is the time the binding site has been open and  $K_{Act}$  is the SF binding rate. Number of new SFs that can be recruited is limited by a finite max number of SFs possible in the cell ( $n_{SF}$ ). The new stress fibers are not explicitly simulated as the initial free SFs described in part 2, but are included as newly formed ECM-Integrin-SF complexes described in part 3, within the vicinity of and parallel to the recruiting ECM-Integrin-SF complex.

- 7) The forces at all bound ECM-Integrin-SF complexes are then summed ( $\sum \vec{F}$ ) to get the net force on the cell, which is divided by the friction factor due to bound integrins to calculate the distance the cell will move before the next time step, Equation 7.

$$\vec{d} = \Delta t \frac{\sum \vec{F}_i}{n_b \Pi} \quad (\text{Equation 7})$$

where  $F$  is force the force generated by each SF,  $n_b$  number of active integrin bonds, and  $\Pi$  is the friction factor for an individual bond. The direction of migration also determines the new leading and trailing edges of the cell.

- 8) SF ends attached to active integrin bonds remain stationary in space as the cell moves. ECM-Integrin-SF complexes deteriorate if all integrin-ECM bonds an SF is attached to are broken. When no ECM-Integrin-SF complexes remain attached in the FA, the FA is dissolved releasing a free SF into the cell. The position of the free SF end is updated with the cell position before the next iteration begins.
- 9) During any timestep, the dynamics of the free SFs (SFs not bound to integrins) are determined as described in part 2.

Values for each parameter used in this model are shown in [Table S1](#). We simulate 24 hours of cell migration, and track the cells position relative to the soft/stiff boundary as in the time-lapse microscopy images, ([Supplemental Information, Video S3](#)). The model loops through the flow schematic in [Figure S4A](#) and described in detail above, with each loop comprising a single timestep.

### Immunofluorescence staining and FA analysis

MDA-MB-231 cells were seeded onto single moduli gels (either 0.48 kPa or 1.8 kPa) and allowed to adhere overnight. Cells were washed with PBS with cations and fixed with 4% paraformaldehyde for 10 minutes. Fixed cells were then stained with deep red cell mask in PBS (1:1000 v/v; Thermofisher Scientific) for 10 minutes. 0.1% TritonX in PBS was used to permeabilize the cells for 10 minutes. Blocking was done with PBS supplemented with FBS (10% v/v, Gemini Bio) for 20 minutes at room temperature. Cells were incubated overnight at 4 C with primary paxillin antibody (1:500; ab32084, Abcam) in blocking buffer. Gels were then washed with blocking buffer and incubated with secondary Alexa Fluor 488-conjugated antibody (1:500; A11008, Invitrogen) and rhodamine phalloidin (1:3000, R415, Thermofisher Scientific) for 1 hour at room temperature, followed by Hoechst 33342 (1:2000; Invitrogen) in DI water for 10 minutes. Coverslips were then mounted onto slides with Flouromount-G (Southern Biotech). Samples were imaged using a Zeiss LSM 780 confocal microscope (Zeiss) with a 63x oil-immersion objective. A custom MATLAB script was used to measure cell area and size and number of focal adhesions.

### Cytokine antibody array

Media was analyzed using the Proteome Profiler Human XL Cytokine Array (R&D Systems). Briefly, membranes were blocked for 1 hour using array buffer, and media was then combined with array buffer overnight at 4°C with rocking. Membranes were washed, incubated with the antibody cocktail diluted for 1 hour, washed, and incubated with streptavidin-HRP for 30 minutes, and finally treated with chemiluminescent reagent mix; membranes were exposed to film and imaged. Pixel quantification was performed in ImageJ and normalized to positive and loading controls. Conditioned media for SA and WA cells on 0.35 and 1.8 kPa substrates were normalized to internal loading control spots and plotted against each other.

### QUANTIFICATION AND STATISTICAL ANALYSIS

Comparisons for migration speeds and traction forces were done using a two-tailed unpaired t test or one-way ANOVA with Tukey test for multiple comparisons for the indicated comparisons where appropriate and as indicated. Categorical comparisons for durotactic, anti-durotactic, and adurotactic cells were done using a Fisher's exact test using definitions from the 2D migration assay section of this manuscript; again, durotactic cells were defined as cells that are on the soft region at the start of the time lapse and migrated to the stiff in the 24 hours of imaging, and vice versa for anti-durotactic. Adurotactic cells were defined as cells that crossed the boundary at some point during imaging and returned to the substrate they started on. Probability density estimations were calculated using MATLAB's kernel smoothing function and plotted to visualize cell distributions at the start of imaging ( $t = 0$  h) and after 24 hours of imaging ( $t = 24$  h). The theoretical optimum bandwidth for the kernel smoothing function was used to generate reasonably smooth curves. Despite potential errors near the edges of the bounded region ( $-57.5$  to  $85 \mu\text{m}$  of the boundary), to reduce sensitivity to sampling error, we chose to use an unbounded KDE. This does not affect the cell density estimation near the stiffness gradient. P values for all analyses, \*,  $p < 0.05$ ; \*\*,  $p < 0.01$ ; \*\*\*,  $p < 0.001$ ; and \*\*\*\*,  $p < 0.0001$ . Outliers were removed only in plotting using MATLAB's quartiles method, so box-and-whisker plots remove points outside the whisker ends, defined by 1.5 inter-quartile ranges above the upper quartile or below the lower quartile. Other error bars were expressed as mean  $\pm$  SD. Statistical analyses were done using MATLAB.

**Cell Reports, Volume 34**

**Supplemental information**

**Adhesion strength and contractility**

**enable metastatic cells to become adurotactic**

**Benjamin Yeoman, Gabriel Shatkin, Pranjali Beri, Afsheen Banisadr, Parag Katira, and Adam J. Engler**



1  
2  
3  
4  
5  
6  
7  
8  
9  
10  
11  
12  
13  
14  
15  
16  
17  
18  
19  
20  
21  
22  
23  
24  
25

## Supplementary Information

### Adhesion Strength and Contractility Enable Metastatic Cells to become Adurotactic

Benjamin Yeoman<sup>1,3</sup>, Gabriel Shatkin<sup>1</sup>, Pranjali Beri,<sup>1</sup> Afsheen Banisadr,<sup>2</sup> Parag Katira<sup>3,4†</sup>, and Adam J. Engler<sup>1,2,5‡</sup>

<sup>1</sup>Department of Bioengineering and <sup>2</sup>Biomedical Sciences Program, University of California, San Diego; La Jolla, CA 92093 USA

<sup>3</sup>Department of Mechanical Engineering and <sup>4</sup>Computational Sciences Research Center, San Diego State University; San Diego, CA 92182 USA

<sup>5</sup>Sanford Consortium for Regenerative Medicine; La Jolla, CA 92037 USA

†Corresponding Authors: [pkatira@sdsu.edu](mailto:pkatira@sdsu.edu)  
[aengler@ucsd.edu](mailto:aengler@ucsd.edu)

### MANUSCRIPT INFORMATION

*Abstract Word Count:* 147 words

*Manuscript Word Count:* 28,292 characters (including spaces and figure legends but excluding STAR Methods text, supplemental item legends, and References section)

*Figure Count:* 4

*Supplemental Figure Count:* 4

*Supplemental Video Count:* 7

*Supplemental Tables:* 1

### Running Title

Weakly Adherent Metastatic Cells are Adurotactic

Supplemental Figures

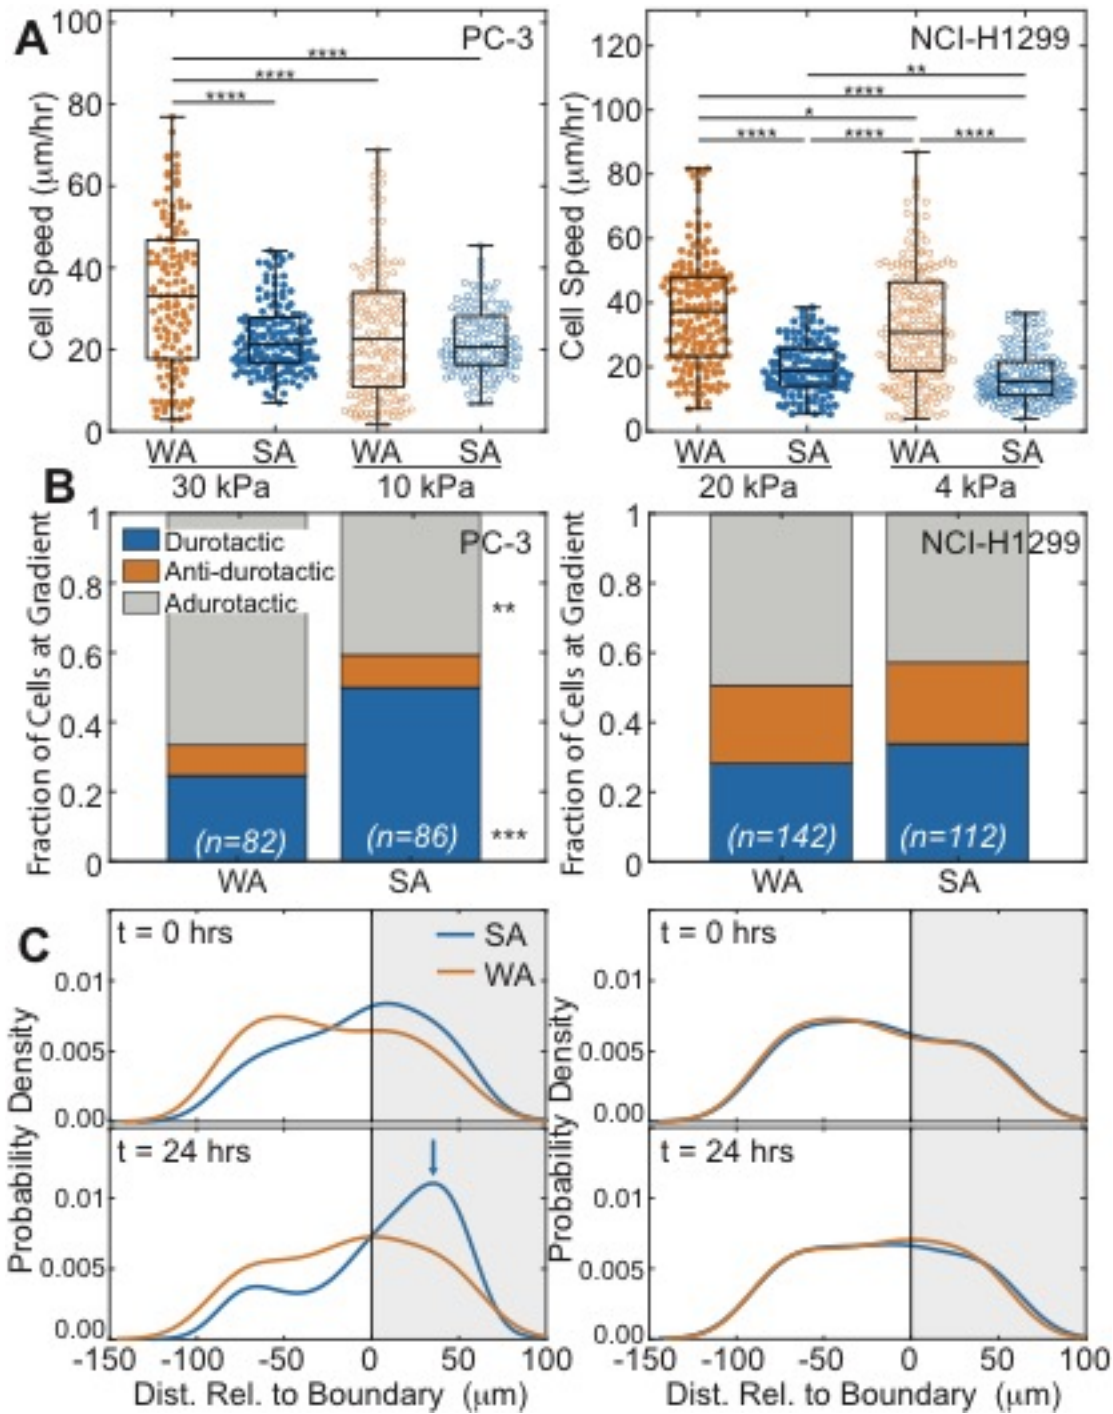

28

29 Supplemental Figure S1: Weakly adherent cells exhibit higher adurotactic behavior, Related to Figure

30 1. (A) PC-3 (left) and NCI-H1299 (right) cell speed on soft or stiff side of step-gradient hydrogels is

31 plotted. Data is shown for cells sorted by adhesion strength, i.e. weakly (orange) vs. strongly (blue), and  
32 cells on softer (open) vs. stiffer (closed) regions. ( $n > 200$  cells for each condition from triplicate  
33 experiments). **(B)** For adhesion sorted PC-3 and NCI-H1299 cells that encounter the step-gradient, the  
34 fraction of durotactic, anti-durotactic, and adurotactic behavior is plotted. Data represents  $n = 82$  of 210  
35 WA PC-3 cells and 86 of 246 SA PC-3 cells and  $n = 142$  of 231 WA NCI-H1229 cells and 112 of 247 SA NCI-  
36 H1299 cells over triplicate experiments; those not counted did not interact with the gradient. **(C)** At 0  
37 and 24 hours, PC-3 and NCI-H1299 cell probability density versus hydrogel position is shown for weakly  
38 (orange) vs. strongly (blue) adherent cells from triplicate experiments. The stiffer region is shaded in  
39 gray. Blue arrow indicates a peak in the strongly adherent cell distribution at 24 hours.  $*p < 0.05$ ,  $**p < 10^{-2}$ ,  
40  $***p < 10^{-4}$ ,  $****p < 10^{-5}$  determined by one-way ANOVA with Tukey test for multiple comparisons for  
41 the indicated cell speed comparisons and a Fisher's exact for durotactic frequencies for the indicated  
42 comparisons.  
43

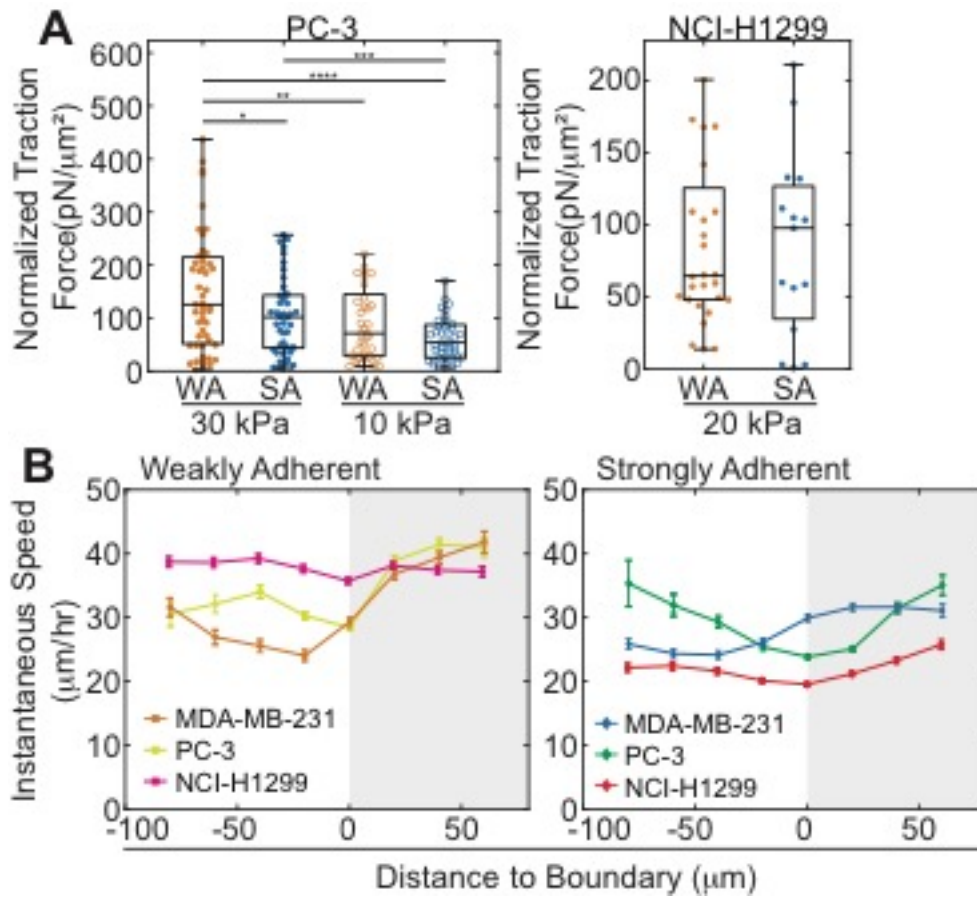

45

46 **Supplemental Figure S2: Traction forces and instantaneous speed for PC-3 and NCI-H1299 cells,**47 **Related to Figure 2. (A)** Traction force, normalized to cell area, plotted for PC-3 cells on soft or stiff

48 single-modulus (left) hydrogels and NCI-H1299 cells on stiff hydrogels (right). Data is shown for weakly

49 (orange) vs. strongly (blue) adherent cells, and open circles for PC-3 cells on soft ( $n > 47$  for PC-3,  $n > 15$  for50 NCI-H1299). \* $p < 0.05$ , \*\* $p < 0.01$ , \*\*\* $p < 0.001$ , and \*\*\*\* $p < 0.0001$  via one-way ANOVA with Tukey test for51 multiple comparisons for the indicated comparisons. **(B)** Instantaneous cell speed is plotted as a

52 function of position relative to the step-gradient for adhesion sorted weakly (left) and strongly (right)

53 adherent MDA-MB-231 (orange/blue), PC-3 (yellow/green), and NCI-H1299 (pink/red) cells. Negative

54 values are on the soft substrate and positive are on the stiff. Average speed  $\pm$  standard error of the55 mean is plotted for  $n > 144$  cells for each condition from triplicate experiments.

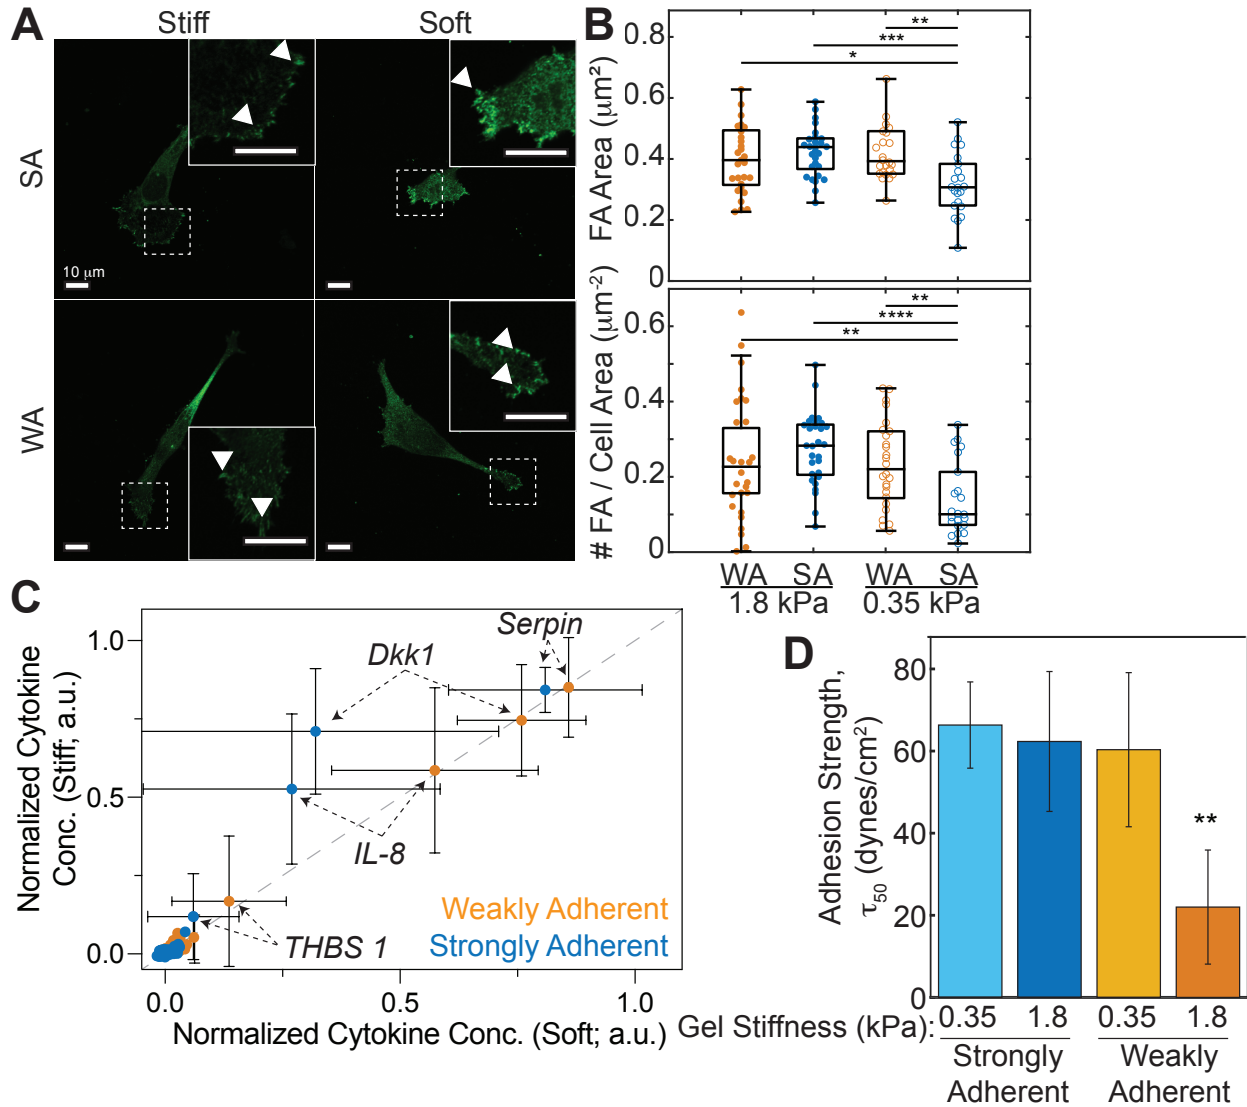

56

57 **Supplemental Figure S3: Effects of Focal adhesions, Cytokines, and Stiffness on Adhesion, Related to**

58 **Figure 2. (A)** Representative images of FAs in weakly and strongly adherent MDA-MB-231 cells on soft or

59 stiff single modulus hydrogels. Paxillin is shown in green and highlighted in the inset images (dashed

60 boxes indicating which regions are magnified) by arrowheads that point to representative paxillin

61 adhesions. Scale bar is 10  $\mu\text{m}$ . **(B)** FA area (top) and number of FAs normalized to cell area (bottom) are

62 plotted for the indicated sorting and elasticities.  $n > 20$  cells/condition from triplicate experiments. **(C)**

63 Cytokine expression for WA and SA cells, normalized to loading controls, is plotted  $\pm$  standard deviation

64 for 105 cytokines found in cell culture media collected from WA (orange) and SA (blue) MDA-MB-231

65 cells plated onto soft (0.35 kPa) and stiff (1.8 kPa) hydrogels for 24 hours. Specific cytokines expressed  
66 above background noise are noted with corresponding error bars from triplicate media collections;  
67 dashed arrows link cytokine names with their respective data. No data was statistically different  
68 between substrate stiffness or adhesion mechanotype based on one-way ANOVA with Tukey test for  
69 multiple comparisons. **(D)** Post-selection weakly and strongly adherent MDA-MB-231 cells were plated  
70 onto hydrogels of indicated stiffness and subjected to a shear stress gradient. Adhesion strength or  $\tau_{50}$ ,  
71 i.e. the shear stress at which 50% of the population detaches from the substrate, is plotted  $\pm$  standard  
72 deviation. \* $p < 0.05$ , \*\* $p < 0.01$ , \*\*\* $p < 0.001$ , and \*\*\*\* $p < 0.0001$  via one-way ANOVA with Tukey test for  
73 multiple comparisons for the indicated comparisons.

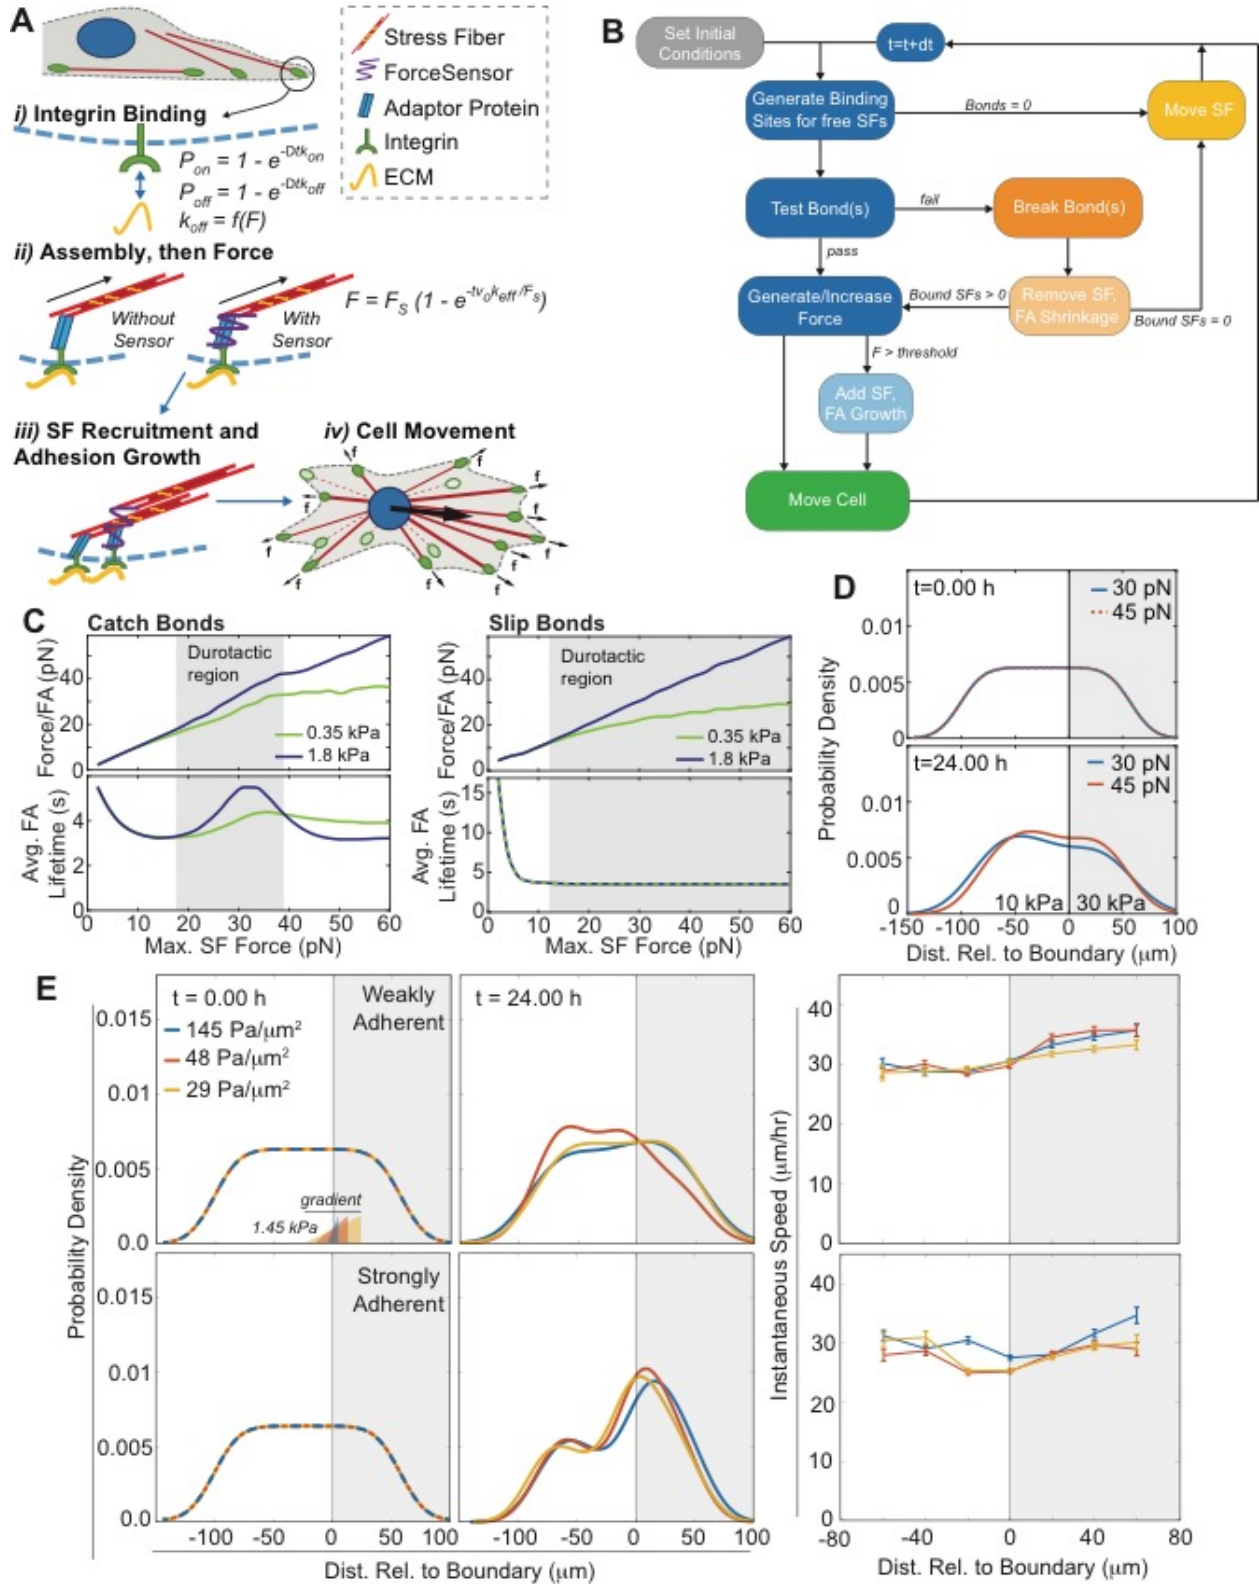

74

75 **Supplemental Figure S4: Computational Model Schematic and it's Sensitivity to Stiffness Range and**

76 **Gradient Strength, Related to Figure 3. (A) Schematic of rigidity sensing in cells where softer catch**

77 bonds, i.e. strongly adherent cells, leads to asymmetric adhesion maturation at the step-gradient  
78 whereas stiffer bonds in weakly adherent cells break and prevent rigidity sensing. This occurs in four  
79 phases: i) integrin binding, ii) assembly and force production, iii) adhesion growth and stress fiber  
80 recruitment, and iv) cell movement. **(B)** Diagram indicates the decision logic for the computational  
81 durotaxis model described in Figures 2 and 3. Gray indicates initial conditions, which feed in to the force  
82 on adhesions equations (blue). Adhesion outcomes are shown in orange with cell migration shown in  
83 green. Arrows indicate the decision logic with notes about each pathway indicated above or to the side  
84 of the decision. **(C)** Comparison of catch (left) and slip (right) bond dynamics, Force/FA (top) and average  
85 FA lifetime (bottom) as a function of max SF force for ECM stiffnesses fixed at 0.35 or 1.8 kPa (green and  
86 blue, respectively). The gray region highlights where force is greater and bond lifetime is also greater or  
87 equal than it is on soft, which corresponds to the onset of durotactic behavior. **(D)** Model cell durotaxis  
88 on gradients with a different stiffness range at 0 and 24 hours, model cell probability density versus  
89 simulated hydrogel position is shown for cells with 45 pN (orange) vs. 30 pN (blue) max SF force. The  
90 stiffer region is shaded in gray (30 kPa) vs. the softer region in white (10 kPa); values were chosen to  
91 mirror prostate tumor gradients rather than mammary tumor gradients to which model parameters  
92 were otherwise tuned. **(E)** Model cell durotaxis on gradients of different magnitude but same stiffness  
93 range. (Left) At 0 and 24 hours, model cell probability density versus simulated hydrogel position is  
94 shown for cells with 45 pN (Weakly Adherent) vs. 30 pN (Strongly Adherent) max SF force. The stiffer  
95 region is shaded in gray (1.8 kPa) vs. the softer region in white (0.35 kPa); gradient slope was changes as  
96 indicated. All previous simulations use  $145 \text{ Pa}/\mu\text{m}^2$  (blue) but plots here also include gradients 3- (dark  
97 orange) and 5-fold shallower (light orange). (Right) Instantaneous cell velocities  $\pm$  S.E.M. for the  
98 indicated gradients and WA (top) or SA (bottom).



## Supplementary Tables

| Parameter    | Description                              | Value                                                            | Source                                                     |
|--------------|------------------------------------------|------------------------------------------------------------------|------------------------------------------------------------|
| $\mu_{SF}$   | Average assembly sites/cell              | Adjustable, 50                                                   | (Elosegui-Artola et al., 2014)                             |
| $v_{act\_L}$ | Actin assembly, leading edge             | $0.2 \mu\text{m s}^{-1}$                                         | (Pollard, 1986; Prah et al., 2020; Vavylonis et al., 2005) |
| $v_{act\_T}$ | Actin assembly, trailing edge            | $0.1 \mu\text{m s}^{-1}$                                         | (Pollard, 1986; Prah et al., 2020; Vavylonis et al., 2005) |
| $v_{ret}$    | Actin disassembly velocity               | $0.5 \mu\text{m s}^{-1}$                                         | (Vavylonis et al., 2005)                                   |
| $t_{ret}$    | Retraction Time                          | 10 s                                                             | (Bosgraaf and Van Haastert, 2009b, 2009a)                  |
| $D_{rot}$    | Rotational diffusion constant of F-actin | Calculated, $\text{s}^{-1}$                                      |                                                            |
| $k_B$        | Boltzmann's constant                     | $1.3806\text{E-}23 \text{ kg m}^2 \text{ s}^{-2} \text{ K}^{-1}$ |                                                            |
| T            | Temperature                              | 310.15 K                                                         |                                                            |
| L            | Length of actin filament                 | Calculated, $\mu\text{m}$                                        |                                                            |
| $d_{act}$    | Diameter of Actin                        | 7 nm                                                             | (Cooper, 2000)                                             |
| $\eta$       | Cytoplasm (water) viscosity @ 37C        | 0.0006913 Pa s                                                   |                                                            |
| $K_{on}$     | Integrin-SF assembly rate                | $0.1 \text{ s}^{-1}$                                             | (Bidone et al., 2019; Vicente-Manzanares et al., 2009)     |
| $\mu_{Int}$  | Average Integrins/F-actin                | 1                                                                | (Blystone, 2004)                                           |
| $P_{tal}$    | Probability of force-sensor protein      | 0.7                                                              | (Himmel et al., 2009)                                      |
| $k_{off}$    | Unbinding rate                           | Calculated, $\text{s}^{-1}$                                      |                                                            |
| A            | Fitting constant                         | 3.309                                                            |                                                            |
| B            | Fitting constant                         | 0.0003942                                                        |                                                            |
| C            | Fitting constant                         | 58.19                                                            |                                                            |
| $\xi$        | Unbinding length                         | 0.7959 nm                                                        | (Kong et al., 2009)                                        |
| $k_0$        | Unloaded off rate                        |                                                                  |                                                            |
| $F_b$        | Bond rupture force                       |                                                                  |                                                            |
| $F_S$        | Max filament force                       | $F_{myo} \times n_{myo}$                                         |                                                            |
| $F_{myo}$    | Myosin Motor Force                       | 2 pN                                                             | (Molloy et al., 1995)                                      |
| $n_{myo}$    | # of Myosin Motors/F-actin               | Adjustable, 10-25                                                | (Cooper and Hausman, 2007)                                 |
| $v_0$        | Myosin sliding velocity                  | $1 \mu\text{m s}^{-1}$                                           | (Brizendine et al., 2015)                                  |
| $K_{ECM}$    | ECM stiffness                            | ECM modulus x 0.1 $\mu\text{m}$                                  | length scale typical for myosin sensing                    |
| $E_{stiff}$  | Young's modulus, Stiff                   | 1800 Pa, Measured experimentally                                 |                                                            |
| $E_{soft}$   | Young's modulus, Soft                    | 350 Pa, Measured experimentally                                  |                                                            |
| $L_{grad}$   | Gradient Length                          | 10 $\mu\text{m}$ , from AFM measurements                         |                                                            |
| $F_{thres}$  | Force sensor threshold                   | 1 pN                                                             | (Grashoff et al., 2010; Rio et al., 2009)                  |
| $K_{act}$    | Actin-Talin assembly rate                | $1 \text{ s}^{-1}$                                               | (Tapia-Rojo et al., 2020)                                  |
| $n_{SF}$     | Maximum SFs/FA                           | Adjustable, 100                                                  | (Prah et al., 2020)                                        |
| $\Pi$        | Bond friction factor                     | $2 \times 10^{-5} \text{ kg s}^{-1}$                             | (Pompe et al., 2011)                                       |

100 **Supplementary Table S1: Model parameters for the cell durotaxis model, Related to STAR Methods.**

101 Parameters are listed in order of appearance in methods section. Note that for Figure S7,  $E_{\text{stiff}}$  and  $E_{\text{soft}}$

102 were changed as indicated.
